1 **PPM1D is a neuroblastoma oncogene and therapeutic target in childhood neural**  
2 **tumors.**

3

4 Jelena Milosevic<sup>1,2\*</sup>, Susanne Fransson<sup>3</sup>, Miklos Gulyas<sup>4</sup>, Gabriel Gallo-Oller<sup>1</sup>, Thale K  
5 Olsen<sup>1</sup>, Diana Treis<sup>1</sup>, Malin Wickström<sup>1</sup>, Lotta HM Elfman<sup>1</sup>, Baldur Sveinbjornsson<sup>1,5</sup>, Falk  
6 Hertwig<sup>6</sup>, Christoph Bartenhagen<sup>7,8</sup>, Susanne Reinsbach<sup>3</sup>, Margareta Wilhelm<sup>9</sup>, Frida Abel<sup>3</sup>,  
7 Niloufar Javanmardi<sup>3</sup>, Subazini Thankaswamy-Kosalai<sup>10</sup>, Nina Eissler<sup>1</sup>, Anna Kock<sup>1</sup>, Yao  
8 Shi<sup>11</sup>, Keiji Tanino<sup>12</sup>, Jane Y Hehir-Kwa<sup>13</sup>, Arjen Mensenkamp<sup>14</sup>, Godelieve AM Tytgat<sup>13</sup>,  
9 Chandrasekhar Kanduri<sup>10</sup>, Johan Holmberg<sup>11</sup>, David Gisselsson<sup>15</sup>, Jan J Molenaar<sup>13</sup>, Marjolijn  
10 Jongmans<sup>13</sup>, Matthias Fischer<sup>7,8</sup>, Marcel Kool<sup>16,17</sup>, Kazuyasu Sakaguchi<sup>18</sup>, Ninib  
11 Baryawno<sup>1,19</sup>, Tommy Martinsson<sup>3</sup>, John Inge Johnsen<sup>1,†</sup>, Per Kogner<sup>1,\*,†,#</sup>

12

13 <sup>1</sup>Childhood Cancer Research Unit, Department of Women's and Children's Health,  
14 Karolinska Institutet, Stockholm, Sweden.

15 <sup>2</sup>Center for Regenerative Medicine, Massachusetts General Hospital, Boston, United States.

16 <sup>3</sup>Department of Laboratory Medicine, Institute of Biomedicine, University of Gothenburg,  
17 Gothenburg, Sweden.

18 <sup>4</sup>Department of Immunology, Genetics and Pathology, Uppsala University, Uppsala, Sweden.

19 <sup>5</sup>Department of Medical Biology, University of Tromsø, Tromsø, Norway.

20 <sup>6</sup>Department of Pediatric Oncology and Hematology, Charité-Universitätsmedizin Berlin,  
21 Berlin, Germany.

22 <sup>7</sup>Department of Experimental Pediatric Oncology, University Children's Hospital, Cologne,  
23 Germany.

24 <sup>8</sup>Center for Molecular Medicine (CMMC), Medical Faculty, University of Cologne, Cologne,

25 Germany.

26 <sup>9</sup>Department of Microbiology, Cell and Tumor Biology, Karolinska Institutet, Stockholm,  
27 Sweden

28 <sup>10</sup>Department of Medical Genetics and Cell Biology, Institute of Biomedicine, Sahlgrenska  
29 Academy, University of Gothenburg, Gothenburg, Sweden.

30 <sup>11</sup>Department of Cell and Molecular Biology, Karolinska Institutet, Stockholm, Sweden.

31 <sup>12</sup>Laboratory of Organic Chemistry II, Department of Chemistry, Faculty of Science, Hokkaido  
32 University, Sapporo, Japan

33 <sup>13</sup>Princess Máxima Center for Pediatric Oncology, Utrecht, The Netherlands.

34 <sup>14</sup>Department of Human Genetics, Radboud University Medical Center, Nijmegen, The  
35 Netherlands

36 <sup>15</sup>Department of Genetics and Pathology, University of Lund, Lund, Sweden.

37 <sup>16</sup>Hopp Children's Cancer Center (KiTZ), Heidelberg, Germany.

38 <sup>17</sup>Division of Pediatric Neurooncology, German Cancer Research Center (DKFZ),  
39 Heidelberg, Germany.

40 <sup>18</sup>Laboratory of Biological Chemistry, Department of Chemistry, Faculty of Science,  
41 Hokkaido University, Sapporo, Japan.

42 <sup>19</sup>Department of Stem Cell and Regenerative Biology, Harvard University, Cambridge, USA.

43  
44 †Senior authors with equal contribution

45 \*Correspondence: [jelena.milosevic@ki.se](mailto:jelena.milosevic@ki.se) (J.M.) and [Per.Kogner@ki.se](mailto:Per.Kogner@ki.se) (P.K.)

46 #Lead contact: [Per.Kogner@ki.se](mailto:Per.Kogner@ki.se) (P.K.)

47

48 RUNNING TITLE: *PPM1D* is an oncogene and therapeutic target in cancer

49

50 **KEYWORDS**

51 Neuroblastoma, chromosome 17q, p53, WIP1, *PPM1D*

52 **SUMMARY**

53 Majority of cancers harbor alterations of the tumor suppressor *TP53*. However, childhood  
54 cancers, including unfavorable neuroblastoma, often lack *TP53* mutations despite frequent  
55 loss of p53 function, suggesting alternative p53 inactivating mechanisms.

56 Here we show that p53-regulating *PPM1D* at chromosome 17q22.3 is linked to aggressive  
57 tumors and poor prognosis in neuroblastoma. We identified that WIP1-phosphatase encoded  
58 by *PPM1D*, is activated by frequent segmental 17q-gain further accumulated during clonal  
59 evolution, gene-amplifications, gene-fusions or gain-of-function somatic and germline  
60 mutations. Pharmacological and genetic manipulation established WIP1 as a druggable target  
61 in neuroblastoma. Genome-scale CRISPR-Cas9 screening demonstrated *PPM1D* genetic  
62 dependency in *TP53* wild-type neuroblastoma cell lines, and shRNA *PPM1D* knockdown  
63 significantly delayed in vivo tumor formation. Establishing a transgenic mouse model  
64 overexpressing *PPM1D* showed that these mice develop cancers phenotypically and  
65 genetically similar to tumors arising in mice with dysfunctional p53 when subjected to low-  
66 dose irradiation. Tumors include T-cell lymphomas harboring *Notch1*-mutations, *Pten*-  
67 deletions and p53-accumulation, adenocarcinomas and *PHOX2B*-expressing neuroblastomas  
68 establishing *PPM1D* as a *bona fide* oncogene in wtTP53 cancer and childhood neuroblastoma.  
69 Pharmacological inhibition of WIP1 suppressed the growth of neural tumors in nude mice  
70 proposing WIP1 as a therapeutic target in neural childhood tumors.

## 71 INTRODUCTION

72 Childhood cancers differ from adult malignancies in terms of histopathological entities,  
73 biological and clinical features and molecular landscapes<sup>1</sup>. Pediatric tumors are much less  
74 complex in their molecular makeup and exhibit significantly less genomic aberrations and  
75 mutations compared to adult cancers<sup>2</sup>. Despite this, childhood cancer is still the leading cause  
76 to death of disease in the developed countries. The tumor suppressor gene *TP53* is the most  
77 commonly mutated gene in cancer, and *TP53* mutations are detected in more than 50% of  
78 adult cancer. Pediatric cancers on the other hand, exhibit significantly less *TP53* mutations<sup>3</sup>.  
79 Neuroblastoma, a childhood tumor of the peripheral nervous system exhibits infrequent *TP53*  
80 mutations<sup>3</sup>. However, p53 activity is commonly impaired and relapsed tumors demonstrate  
81 increased incidence of *TP53* mutations<sup>4</sup>. This suggests that inactivation of p53 is important for  
82 tumorigenesis and that alternative mechanisms for p53 attenuation are operating in  
83 neuroblastoma.

84 Segmental gain of chromosome 17q is the most common chromosomal aberration and  
85 correlates to poor prognosis in neuroblastoma<sup>5-7</sup>. Located within the gained regions of 17q in  
86 high-risk neuroblastoma is the Protein phosphatase magnesium-dependent 1 delta (*PPM1D*)  
87 gene which encode the nuclear serine/threonine phosphatase WIP1 (wild-type p53 induced  
88 phosphatase 1)<sup>8</sup>. WIP1 is a critical regulator of DNA damage response and cell cycle  
89 progression by its ability to regulate the activity of p53, ATM, CHK1/2 and other key  
90 molecules involved in DNA repair, cell cycle progression and apoptosis<sup>9-13</sup>. In concordance,  
91 *PPM1D* mutations, amplifications and WIP1 overexpression has been observed in various  
92 cancers<sup>7,14-21</sup>. This suggest that *PPM1D* is important for tumorigenesis although conclusive  
93 evidences for *PPM1D* being an oncogene inducing cancer is still missing.

94

95 Here we use multiomic approaches to understand genetic development of neuroblastom focusing on  
96 the most common aberration, gain of chromosome 17q, and the oncogenic features of *PPM1D* and p53  
97 regulating WIP1 phosphatase We show that neuroblastoma patients harbor frequent *PPM1D*  
98 copy number gain and gene fusions, in addition to activating truncating germ-line and somatic  
99 mutations. We further inferred that overexpression of WIP1 in transgenic mice, in conjunction  
100 with cellular stress, induce development of an array of tumors including neuroblastoma,  
101 demonstrating that the *PPM1D* is a *de novo* oncogene with the potential to induce  
102 tumorigenesis without the support of additional oncogene activities. Finally, we show that  
103 WIP1 is a potential clinical therapeutic target in childhood neural tumors.

104 **RESULTS**

105 **Chromosome 17q-gain containing *PPM1D* is the most common genetic aberration in**  
106 **neuroblastoma with additional *PPM1D* copies acquired through clonal evolution**

107 To explore the genetic aberrations in neuroblastoma, we used array-based comparative  
108 genomic hybridization (CGH) to detect genetic aberrations in 271 Swedish neuroblastomas.

109 Gain of chromosome arm 17q was the most common genetic aberration observed and either  
110 segmental 17q gain or whole chromosome 17 gains were present in 82% of the tumors  
111 (**Figure S1A**). The majority of unfavorable neuroblastoma, harbored segmental gains of 17q  
112 whereas favorable neuroblastomas commonly display whole chromosome 17 gains.

113 Neuroblastoma patients with segmental 17q gain show worse clinical outcome compared to  
114 those without 17q gain (5-year overall survival probability 48.0% vs. 82.8%;  $P=9.8 \times 10^{-9}$ ;

115 **Figure 1A**). The children with favorable neuroblastoma without segmental 17q-gain (or  
116 *MYCN* amplification and/or 11q-deletion) had favorable long-term survival at 8-20 years from  
117 diagnosis (>90%), in most cases without any treatment, compared to those with 17q-gain  
118 receiving active multimodal therapy with risk of late sequelae and still poor survival (<40%;  
119 **Figure S1B**), further validating 17q-gain as a prognostic marker.

120 Our data for the 271 analyzed Swedish neuroblastoma cases (**Figure S1A**) were extended  
121 with multiple samples to a total of 435 analyzed samples showed 208 tumors with segmental  
122 gain of chromosome 17q. Given the close propinquity to the proximal breakpoints associated  
123 with 17q gain and presence in all tumors with segmental 17q gain, the most prominent gene  
124 candidates with tumorigenic capacity are *RAD51C*, *PPM1D* and *BRIPI* (**Figure 1B**) out of  
125 which only *PPM1D* is a previously proposed putative oncogene  
126 (<http://www.cancer.sanger.ac.uk/cosmic/mutation/>).

127



128 To further delineate a candidate gene involved in cancer development and to investigate  
129 *PPM1D* in neuroblastoma progression, we used evolutionary trajectory analysis<sup>22</sup>.  
130 Neuroblastoma copy number status was investigated during tumor progression where we  
131 analyzed SNP array data of 100 tumor samples from 23 children with neuroblastoma<sup>22</sup> with  
132 focus on chromosome 17. Most tumors (57%, 13/23) were found to harbor gain of 17q (17q+,  
133 always including *PPM1D* in the chromosomal gain) in >90% of the tumor cells in all samples,  
134 confining this aberration to the stem of evolutionary ideograms, without further change in  
135 copy number (**Figures 1C,I and Tables S1**). However, 30% (7/23) of the tumors showed a  
136 successive accumulation of 17q copies as tumors evolved regionally or from primary tumor to  
137 metastasis or relapse. In four of these cases, *PPM1D*/17q was gained already in the  
138 phylogenetic stem, followed by gain of additional copies of these genes as regional clones  
139 evolved (**Figure 1C, II**). In three cases, clones with *PPM1D*/17q gain emerged in subset of  
140 samples, where they expanded through selective sweeps to encompass all tumor cells in the  
141 samples (**Figure 1C, III**). The remaining 13% of patients (3/23) harbored a regionally  
142 fluctuating copy number status of *PPM1D*/17q that precluded conclusive evolutionary  
143 analysis. Among the 20 cases informative for evolutionary analysis, successive accumulation  
144 of *PPM1D*/17q copies was observed in more than half of high-risk patients (7/13) (**Table S1**).  
145 In contrast, additional changes in 17q copy number were not found in any of the low-risk  
146 patients, i.e. children <18 months with only numerical changes in the stem (0/7;  $P=0.0445$ ;  
147 two-sided Fisher's exact test). Thus, here we identify *PPM1D* as the strongest gene candidate  
148 involved in neuroblastoma progression.

149 In additional neuroblastoma cases with multiple tumor samples available for analysis we  
150 show that gain of 17q including *PPM1D* was the single first event in neuroblastoma  
151 development (**Fig 1D, Fig S1C and S1D**) in both a child without known predisposition and in  
152 a child with a germline *PHOX2B* mutation<sup>23</sup>.

153 To examine if mutations are present in neuroblastoma, we next performed whole exome  
154 sequencing (WES) or whole genome sequencing (WGS) of 73 neuroblastoma patient samples  
155 to screen for germline and somatic mutations. Notably, we identified a pathogenic truncating  
156 *PPM1D* mutation in exon 6 (c.1344\_1345insT; p.L450fs) in a *MYCN*-amplified tumor sample  
157 obtained from an infant girl with neuroblastoma rapidly progressing after diagnosis from  
158 localized INSS stage 1 to metastatic INSS stage 4 (**Figures 1E and S1E**) with fatal clinical  
159 outcome despite active therapy. In addition, a *de novo* germline DNA mutation located in  
160 exon 6 (c.1528C>T; p.Q510\*) resulting in a premature *PPM1D* truncation (**Figure 1E**) was  
161 identified in a patient diagnosed with a metastatic (stage 4, INSS/stage M, INRGSS)  
162 neuroblastoma of the left adrenal gland with bone metastases. The tumor was diagnosed in a  
163 26 months old boy with history and symptoms similar to those previously reported in children  
164 with intellectual disabilities and *PPM1D* germline truncating mutations including significant  
165 dysmorphic signs (**Figure S1F**). The tumor had no *MYCN* amplification and the patient had a  
166 poor clinical outcome after relapse and progression despite multimodal clinical therapy. A  
167 detailed description of this patient is given in Star methods. Germline *PPM1D* mutations have  
168 previously not been reported in cancer but have been observed in children with intellectual  
169 disabilities and neurodevelopmental disorders<sup>24,25</sup>. Both these neuroblastoma-associated  
170 *PPM1D* mutations predictably give rise to C-terminal truncated variants of WIP1 similar to  
171 those described in other cancers (**Figure 1E**) ([http://www.cancer.sanger.ac.uk/cosmic/  
172 mutation/](http://www.cancer.sanger.ac.uk/cosmic/mutation/)). In addition, a gene fusion between *PPM1D* and the breast carcinoma amplified  
173 sequence 3 (*BCAS3*) gene at chromosome 17q23.2 was identified in a tumor from a patient  
174 enrolled in the Therapeutically Applicable Research to Generate Effective Treatments  
175 (TARGET) neuroblastoma dataset, which was associated with high expression of *PPM1D* and  
176 a predicted WIP1 isoform with a truncated C-terminal (**Figure 1F**).

177

178 **Overexpression of the *PPMID* gene in neuroblastoma correlates with unfavorable**  
179 **clinical and biological features**

180 Our data demonstrating that the *PPMID* gene is altered in copy number and/or structure in the  
181 majority of high-risk neuroblastomas, prompted us to investigate the clinical prognostic and  
182 biological features of *PPMID* gene expression in neuroblastoma. First, we show that higher  
183 expression levels of *PPMID* was associated with several neuroblastoma risk factors, i.e.  
184 metastatic stage 4 disease, increased age at diagnosis (>18 months), *MYCN*-gene  
185 amplification and the INRG high-risk (HR) group as defined by combined clinical and  
186 biological features associated with unfavorable clinical outcome<sup>26</sup> (**Figure 2A**). Highest level  
187 of *PPMID* expression was observed in the non-*MYCN* amplified HR-neuroblastoma tumors  
188 (nMN HR; **Figure 2A**) mainly corresponding to 11q-deleted tumors that, according the  
189 overall genomic landscape, display the most frequent segmental 17q-gain in the *MYCN* non-  
190 amplified 11q deleted tumors (**Figure S1A**). Second, quantitative copy number (CN) values  
191 for *PPMID* calculated from CGH array, WES and whole genome sequencing (WGS) was  
192 correlated to *PPMID* expression. CN gains were separated into numerical gains that included  
193 whole chromosome 17 and segmental gains that included the sub-region containing *PPMID*.  
194 Correlation analysis revealed a significant stepwise gene dosage dependent expression pattern  
195 of *PPMID*, with the highest expression in tumors with segmental/partial 17q CN gains  
196 (**Figures 2A,B**). Moreover, high *PPMID* expression was related to clinical outcome and  
197 children with neuroblastomas showing high expression had worse overall survival (OS; 59%  
198 vs. 83% at five years,  $p < 0.001$ , **Figure 2C**, left panel) and event-free survival (EFS; 47% vs.  
199 68%,  $p < 0.001$ , **Figure 2C**, right panel). Third, low-risk neuroblastomas characterized by near-  
200 triploid DNA content and high TrkA expression (Type 1)<sup>27</sup> were compared to more aggressive  
201 subtypes commonly having 17q gain with 14q- and/or 11q-deletions (Type 2A) or 1p-deletion  
202 and *MYCN*-amplification (Type 2B) with principal component analysis (PCA) on gene

203 expression profiles from 30 primary neuroblastoma samples from two published microarray  
204 studies<sup>28,29</sup>. High expression of *PPM1D* was associated with aggressive Type 2A and Type 2B  
205 neuroblastomas, while low *PPM1D* expression was observed in Type 1 neuroblastomas  
206 (**Figure S2A**). Fourth, immunohistochemical staining showed consistent WIP1 expression in  
207 all 17q-gained neuroblastoma samples analyzed (**Figure S2B**). Taken together, these data  
208 suggest an increased aggressiveness of neuroblastoma and worse survival for patients with  
209 high WIP1-expressing tumors, in line with the predictions of the 17q gain survival data  
210 (**Figures 1A and S1B**) and the strong *PPM1D*-17q gain correlation (**Figures 1B,C, 2A,B and**  
211 **S2A**). To extend the investigations on the correlation of chromosome 17 gain and *PPM1D*  
212 expression levels, we included medulloblastoma that similar to neuroblastoma also presents  
213 frequent chromosome 17q gain or isochromosome 17<sup>3,30</sup> suggesting that there may be a  
214 common gene that is involved in the development of both cancers. We analyzed a cohort  
215 consisting of 446 human medulloblastoma and 18 normal cerebellum cases and demonstrated  
216 that the highest *PPM1D*/WIP1 expression was detected in the clinically unfavorable Group 3  
217 and 4 subgroups (**Figures S2C, Table S2**), that are in line with previous findings<sup>31</sup>.  
218 Furthermore, we detected one *PPM1D* nonsense mutation in exon 6 (E525X; **Figure 1E**) in a  
219 medulloblastoma tumor of the WNT subgroup (**Figure S2E**), and amplifications of *PPM1D* in  
220 three patient samples belonging to the clinically unfavorable SHH (4-17 years) subgroup  
221 (**Figures S2D and S2F, G**). While, TP53 mutations are significantly associated with the  
222 SHH-group and most pronounced to this particular unfavorable SHH subgroup of  
223 intermediate ages and adverse outcome<sup>32</sup>, neither the *PPM1D* mutated nor the *PPM1D*  
224 amplified tumors in this analysis had TP53 mutations despite similar age- and prognostic  
225 features, indicating an alternative way of impairing p53 function through amplification of  
226 *PPM1D* in these medulloblastoma tumors.

227

228 ***PPM1D* is important for neuroblastoma development and treatment resistance**

229 To comprehensively assess the function of *PPM1D*/WIP1 in neuroblastoma as well as in  
230 medulloblastoma, we used preclinical models of the diseases. First, we examined the  
231 expression of *PPM1D* mRNA in a panel of neuroblastoma and medulloblastoma cell lines, as  
232 well as the breast cancer cell lines MCF-7 and BT-474 exhibiting *PPM1D* gene  
233 amplification<sup>33</sup>, and one sPNET cell line containing isochromosome 17. The cell lines  
234 expressed different levels of *PPM1D* mRNA that correlated to their genomic profile<sup>34,35</sup> with  
235 highest expression in *PPM1D*-amplified cell lines and lowest in those without chromosome  
236 17 aberrations (**Figures S3A, B**). All neuroblastomas expressed *PPM1D* mRNA, and the  
237 highest expression was observed in SK-N-DZ and IMR32, showing expression levels  
238 comparable to the *PPM1D*-amplified breast cancer cell lines MCF-7 and BT-474.  
239 Furthermore, the relative expression level of *PPM1D* mRNA was higher in medulloblastoma  
240 cell lines with 17q-gained aberrations (D283-MED, D458-MED and MEB-MED8A)  
241 compared to cell lines with normal 17q (DAOY, UW228-3 and PFSK-1), further  
242 demonstrating a gene-dosage effect on *PPM1D* mRNA expression (**Figures S3A,**  
243 **and S3C**).

244

245 We next used genome-scale CRISPR-Cas9 screening<sup>36</sup>, and demonstrated that *PPM1D* with  
246 the highest genetic dependency were found in *TP53* wild-type neuroblastoma cell lines  
247 compared to *TP53* mutated cell lines (**Figures 3A and 3B; Supplemental Table S3**). Other  
248 *TP53*-negative regulators such as *MDM2*, *MDM4* and *USP7* were ranked as number 3, 21 and  
249 31, respectively. Among the top 40 ranked genes with largest difference between *TP53* wild-  
250 type and *TP53* mutated, an enrichment of genes involved in negative regulation of cell  
251 proliferation (FDR=0.0117), cell cycle process (FDR=0.0117), cellular response to DNA  
252 damage (FDR=0.05) and chromosome organization (FDR=0.05) (**Figure 3C**) was evident.

253 Focusing on *PPM1D*, *MDM2*, *MDM4* and *USP7*, all of which with pharmacological inhibitors  
254 that are in preclinical testing or clinical trials, we showed that neuroblastoma cell lines have  
255 preferential dependency for all four genes in *TP53* wild-type cell lines (**Figure 3D**). In cell  
256 lines of medulloblastoma origin, *MDM2* showed largest difference in dependency score with  
257 negative regulators *PPM1D*, *USP7* and *MDM4* ranked 6, 41 and 64, respectively (**Figures**  
258 **S3E and S3H**). Among the top 40 genes there is a functional enrichment of pathways  
259 associated to cell cycle (FDR=0.000119), chromosome organization (FDR=0.00065) and  
260 nucleotide biosynthesis processes (FDR=0.003) (**Figure S3G**). As expected from the ranked  
261 differences between *TP53* wild-type and *TP53* mutated medulloblastomas, only *PPM1D* and  
262 *MDM2* showed differences in genetic dependency (**Figure S3H**). When comparing the  
263 genetic vulnerability of *PPM1D*, *MDM2*, *MDM4* and *USP7* in neuroblastoma cells to all the  
264 other cancer cell lines in the CRISPR Avena dataset, both *PPM1D* and *MDM4* showed strong  
265 selective dependency in neuroblastoma (**Figure S3D**) highlighting the essentiality of intact  
266 p53 (**Figure S3F**).

267  
268 To study the potential tumorigenic function of *PPM1D*/WIP1 in neuroblastoma we next used  
269 genetic manipulation through stable knockdown of short-hairpin RNA (shRNA) against  
270 *PPM1D*. The majority of neuroblastoma cell lines transfected with *PPM1D* shRNA were non-  
271 viable compared to scrambled controls (data not shown), whereas cells that were viable after  
272 transfection showed reduced proliferation and increased H2AX phosphorylation, suggesting  
273 an effect on cell viability and genomic integrity (**Figures 3E and S3I**). The multi-resistant  
274 neuroblastoma cell line SK-N-BE(2), isolated from a patient with recurrent stage 4  
275 neuroblastoma was chosen for further analysis since this was one of the few cell lines that was  
276 viable after *PPM1D* shRNA knockdown (**Figure 3E**). Analyzing different shRNAs constructs  
277 directed against *PPM1D* mRNA in SK-N-BE(2) cells established *PPM1D*-shRNA F-1 as the

278 most effective in reducing *PPM1D* mRNA levels (**Figures 3F,G**). *PPM1D* knockdown was  
279 also confirmed by increased phosphorylation of WIP1 target proteins including ATM, CHK1,  
280 CHK2, p53 and p38, all involved in cell cycle regulation and the DNA-damage response  
281 (DDR) (**Figure 3H**). To test the role of *PPM1D* in cellular stress we subjected SK-N-BE(2)  
282 cells to irradiation, and showed that cells lacking *PPM1D* exhibited increased sensitivity to  
283 irradiation compared to control cells (**Figure 3I**). Moreover, higher levels of PARP-cleavage  
284 were detected in *PPM1D* shRNA transfected cells compared to controls, suggesting an  
285 increased vulnerability to apoptosis following irradiation (**Figure 3J**). Furthermore, to  
286 evaluate the effect of *PPM1D* knockdown on tumor development *in vivo*, SK-N-BE(2) cells  
287 with either *PPM1D*-knockdown or control shRNA were injected subcutaneously in mice and  
288 tumor growth was compared. Tumor development was significantly delayed showing median  
289 time to tumor development (0.1 mL tumor volume) to be more than doubled (33 days median,  
290 vs. 15 days) in the *PPM1D* shRNA knockdown group compared to animals injected with  
291 control shRNA-transfected cells ( $P<0.001$ ) (**Figure 3K**).

292

### 293 **Mice carrying the *PPM1D* transgene develop tumors in response to cellular stress**

294 Demonstrating that *PPM1D*/WIP1 is a strong gene candidate in the development of  
295 neuroblastoma and has a critical function in the growth of tumors and their response to  
296 cellular stress, we next investigated the oncogenic potential of *PPM1D*. Hence, we  
297 constructed genetically engineered C57BL/6N mice to overexpress WIP1 through pronuclear  
298 injection of the human *PPM1D* gene controlled by the rat tyrosine hydroxylase (TH) promoter  
299 (**Figure S4A**). Three founder lines were generated with intact transmission of the *PPM1D*-  
300 transgene to following generations.

301

302 Elevated WIP1 protein expression was detected in spleen, ovary and intestine in mice  
303 heterozygous for *PPM1D* compared to wild-type mice (**Figure S4B**). However, no increase in  
304 tumor development was observed in these *PPM1D*-transgenic mice. We therefore  
305 backcrossed the C57BL/6*PPM1D* +/- mice for eight generations with 129x1/SvJ mice to  
306 establish a near 100% 129x1/SvJ background which is more prone to tumor formation. In  
307 addition, given the wide-ranging actions of WIP1 in DNA damage, it is likely that  
308 overexpression of WIP under cellular stress has the potential to induce neoplasms arising in  
309 response to extrinsic cellular DNA damage. Therefore, *PPM1D*-overexpressing animals and  
310 their wild-type littermates were exposed to 4.5 Gy of sub-lethal whole-body irradiation at  
311 different ages (1-314 days old). Irradiated transgenic mice carrying the *PPM1D* gene had  
312 significantly higher tumor incidence (34% tumor probability) compared to wild-type mice  
313 (7.8%) ( $P < 0.0001$ ), 100-300 days post-irradiation (**Figure 4A**). The majority of cancers  
314 detected in *PPM1D*- transgenic mice were similar to those reported in irradiated p53-mutant  
315 mice post-irradiation<sup>37-39</sup>, indicating a similar tumor phenotype caused by p53 impairment  
316 rather than p53 absence. Thymic lymphoblastic lymphoma was the most frequently  
317 malignancy observed (n=41; **Figures 4B,C, Table S4**), compared to four thymic lymphomas  
318 detected in irradiated wild-type mice ( $P < 0.001$ ). Other malignancies manifested in *PPM1D*-  
319 transgenic mice were leukemia/lymphomas (n=9), different adenocarcinomas/adenomas  
320 (n=18) and sarcomas (n=4), (**Table S4**). Importantly, mice also developed neural crest-  
321 derived PHOX2B-expressing primary tumors of the adrenal gland with neuroblastoma-like  
322 features mixed with paraganglioma/pheochromocytoma-like morphology (one of these mice  
323 also displayed PHOX2B-expressing neuroblastoma-like metastasis) (**Figure 4D**), further  
324 supporting that *PPM1D* might be a driver of neuroblastoma development. We also identified  
325 mice with multiple primary tumors, one mouse with an adenocarcinoma in the lacrimal gland  
326 and osteosarcoma with lung metastasis, a mouse with T-cell lymphoma and ovary carcinoma,



327 lung adenocarcinoma and a mouse with a gastric adenocarcinoma and leukemia (**Table S4**).  
328 The odds ratio of developing cancer in mice with the *PPMID* transgene compared to wild-  
329 type mice was 6.3 (95% confidence interval 2.7-14.2). Comparison of age at irradiation and  
330 time to tumor development disclosed a positive correlation, showing that younger *PPMID*-  
331 positive animals were more susceptible to developing thymic lymphomas in response to DNA  
332 damage ( $P<0.01$ ), the majority (38 out of 41) of which arose <365 days post-irradiation  
333 (**Figure 4B**). Protein expression of thymic lymphomas showed high WIP1 expression and  
334 increased phosphorylation of p53 compared to non-irradiated thymus from *PPMID* -positive  
335 and wild-type mice (**Figure S4B**). Other tumor manifestations observed in multiple *PPMID*-  
336 positive mice were spleen, liver, lung and lymph node metastases (**Figure S4C and Table**  
337 **S4**).

338

### 339 ***PPMID*-derived mouse tumors show frequent *Notch1* and *Pten* mutations and activation**

### 340 **of Notch signaling**

341 To characterize the tumors that developed in *PPMID*-transgenic mice, we performed WES on  
342 *PPMID*-derived T-cell lymphomas. Our data showed an average of 18 (range 9-34) somatic  
343 protein-changing mutations compared to non-irradiated wild type control mice. Thymic  
344 tissues from the two control groups, irradiated wild-type mice, and irradiated *PPMID*-positive  
345 mice without tumors, showed an average of two (range 1-4) and three (range 1-5) somatic  
346 protein changing mutation variants, respectively, similar to non-irradiated non-tumorigenic  
347 wild type mice (**Table S5**). These data indicate that irradiation alone was not responsible for  
348 the accumulation of DNA mutations observed in the tumors. Among the thymic lymphomas,  
349 we found *Pten* and *Notch1* to be recurrently altered (**Figure 5**). In total, 15 activating *Notch1*  
350 mutations were detected in 9 of 15 lymphomas (60%) and among these, five tumors had more  
351 than one mutation of the *Notch1* gene. Similar to human cancers, the *Notch1* missense

352 variants were found to cluster in the heterodimerization domain (HD) while frameshift or  
353 nonsense variants were clustered to the proline-glutamic acid-serine-threonine (PEST) domain  
354 (**Figure 5A**). Of the 15 sequenced lymphomas, *Pten* aberrations were detected in 12 cases (80  
355 %) consisting of homozygous deletions (9 cases), missense variants (2 cases) and frameshift  
356 insertion (1 case) (**Figure 5B**). The three missense and frameshift variants all showed high  
357 level variant allele fraction (variant allele fraction 85-97%) suggesting a near homozygous  
358 presence. Mutations of *Pten* and *Notch1* were co-occurring in seven cases (46%) (**Table S5**).  
359 In addition to *Notch1* and *Pten* mutations, aberrations in genes previously associated to  
360 human cancers were also observed in *Irf1*, *Kras*, *Rac2*, *Trp53*, *Cttnb1*, *Gli3*, *Zfp3612*, *Mpdz*,  
361 *Dd3x*, *Foxp1*, *Pin1* and *Ezh2* (**Table S5**). No mutations were found in *Fbxw7*, *Notch2*, *Notch3*  
362 or *Notch4* which also have been associated to thymic lymphomas development in radiation-  
363 induced murine tumors.

364 We also performed RNA-sequencing on the tumors and analyzed them using Principal  
365 component analysis (PCA) and unsupervised hierarchical clustering based on the 200 most  
366 variable genes (**Figure S5A, B**). Differential gene expression analysis (**Table S5**) identified  
367 4138 upregulated and 4378 downregulated genes in tumors when compared to controls.  
368 Tumors harboring *Notch1* mutations had significantly higher expression of the *Notch1* gene  
369 compared to controls (**Figure 5C**). Also, as expected *Pten* expression was significantly lower  
370 in tumors harboring deletions of the gene (**Figure 5D**). Likewise, gene set enrichment  
371 analysis (GSEA) showed corresponding increased expression of genes involved in Notch- and  
372 Mtorc1-signalling in *Notch1* or *Pten* mutated tumors compared to controls (**Figure 5E,F**).  
373 Thus, tumor development was phenotypically and genetically similar to tumors from p53-  
374 impaired mice<sup>38,40</sup> harboring *Notch1*-mutations, *Pten*-deletions and wild-type p53-  
375 accumulation.

376

377 **WIP1 is a therapeutic target in neuroblastoma**

378 Having established that *PPM1D*-knockdown reduces tumor formation in mice and that high  
379 expression of WIP1 is a strong prognostic factor for poor survival in neuroblastoma, we  
380 investigated the effects of compounds inhibiting WIP1 activity in neuroblastoma. To assess  
381 the cytotoxic effects of different WIP1 inhibitors on cell viability, six neuroblastoma cell lines  
382 and the *PPM1D*-amplified breast cancer cell line MCF-7 were treated with different  
383 concentrations of the WIP1 inhibitors SL-176, SP-001 or CCT007093<sup>41-44</sup>. Treatment of  
384 neuroblastoma cell lines showed highest sensitivity to the specific WIP1-inhibitor SL-176  
385 regardless of p53 or Mdm2 status. SL-176 displayed the lowest mean of IC<sub>50</sub> value of the  
386 three tested WIP1 inhibitors ( $P < 0.0001$ ) (**Figures 6A, S6A and Table S6**).

387  
388 To further investigate the potency of the WIP1 inhibitor SL-176 on tumor cell viability in  
389 monotherapy, a panel of cancer cell lines was treated with different concentrations of SL-176,  
390 the p53 modulator RITA, and the MDM2 antagonist Nutlin-3. SL-176 was the most efficient  
391 drug against the neuroblastoma cell lines (mean IC<sub>50</sub> for SL-176: 0.77  $\mu$ M, RITA: 2.0  $\mu$ M and  
392 Nutlin-3: 3.7  $\mu$ M), (**Figure 6B, S6C and Table S6**). SL-176 had similar effects on  
393 medulloblastoma cell viability as the p53 inhibitors RITA and Nutlin-3. However, no  
394 significant differences between the mean IC<sub>50</sub> values in medulloblastoma cell lines were  
395 observed (mean IC<sub>50</sub> for SL-176: 1.1  $\mu$ M, RITA: 0.41  $\mu$ M and Nutlin-3: 3.4  $\mu$ M,  $P = 0.26$ ). The  
396 non-cancerous cell lines, MRC-5 derived from human fetal lung fibroblasts and the mouse  
397 neural progenitor cell line C17.2 were less sensitive to SL-176 (mean IC<sub>50</sub> for SL-176: 22  
398  $\mu$ M, RITA: 9.5  $\mu$ M and Nutlin-3: 2.0  $\mu$ M (**Figures S6B, S6C and Table S6**).

399  
400 Next, we investigated the anti-tumorigenic effect of SL-176 monotherapy in a preclinical *in*  
401 *vivo* model of neuroblastoma Tumor growth inhibition was observed after 1 day of treatment

402 (SK-N-BE(2);  $P=0.01$ ) (**Figure 6C**) while tumor size and weight at the end of the experiment  
403 was significantly smaller in SL-176-treated mice compared to control mice (SK-N-BE(2);  
404  $P<0.01$ , DAOY;  $P<0.05$ ) (**Figures 6C, D**). No adverse effects of SL-176 were observed in the  
405 treatment groups. SL-176 treated tumors showed increase in active caspase-3 and  
406 phosphorylation of the DNA repair protein  $\gamma$ H2AX, whereas reduced levels of the  
407 proliferation marker Ki-67 was observed (**Figure 6E**). Similarly, SL176 also suppressed the  
408 growth of established medulloblastoma xenografts in nude mice (DAOY;  $P=0.02$ , **Figures**  
409 **S6D, E**) with increased expression of active caspase-3 and  $\gamma$ H2AX, and decreased Ki-67  
410 expression (**Figure S6F**). Taken together, our data supports WIP1 as a druggable target in  
411 neuroblastoma and medulloblastoma.

412 **DISCUSSION**

413 Neuroblastoma is a childhood tumor of the developing peripheral nervous system, which  
414 despite intensified multimodal therapy still have a poor outcome when compared to pediatric  
415 cancers in general. For further improvement of management, clinical care and chances of cure  
416 for these patients, advancements in molecular understanding of tumor biology is essential. We  
417 therefore investigated prevalent genetic aberrations in neuroblastoma as well as for  
418 medulloblastoma and our data propose the p53 regulating phosphatase WIP1 encoded by the  
419 chromosome 17q-located *PPM1D* gene as a novel druggable target for both these pediatric  
420 cancers.

421  
422 Segmental gain of 17q is the most common chromosomal aberration and predictor of poor  
423 prognosis detected in neuroblastoma and medulloblastoma<sup>5,6,45</sup>. Also, gain of chromosome  
424 17q is frequently found in tumors of epithelial, neural and hematopoietic origin<sup>46-51</sup>. This  
425 suggests that one or multiple genes important for tumorigenesis are located on 17q. Several  
426 cancer-associated genes have been identified on chromosome 17q that besides *PPM1D* also  
427 include *EME1*, *BRCA1*, *ERBB2*, *NF1*, *RAD51C*, *BRIP1* and *BIRC5*. However, our analysis of  
428 271 Swedish neuroblastoma samples shows that only *RAD51C*, *PPM1D* and *BRIP1* are  
429 included in the shortest region of overlap of 17q gains. These genes were also included in the  
430 17q23.2 chromosomal amplifications detected in three SHH-derived medulloblastomas and  
431 are similar to observations made in breast cancer<sup>19,52,53</sup>. We also show an accumulation of  
432 *PPM1D* gene copies in metastatic and relapsed neuroblastomas compared to low-risk tumors  
433 suggesting a clonal evolution of *PPM1D* in high-risk neuroblastoma. High expression of  
434 *BIRC5*, at chromosome 17q25.3, encoding the anti-apoptotic protein Survivin has been  
435 correlated with poor prognosis in neuroblastoma, whereas in medulloblastoma conflicting  
436 results regarding the importance of Survivin have been reported<sup>54-57</sup>. We detected two somatic

437 *PPMID* mutations, one each from the neuroblastoma and medulloblastoma cohort and one *de*  
438 *novo* germline mutation in one additional neuroblastoma patient. The detected *PPMID*  
439 mutations were all truncating gain-of-function variants and located in exon 6, similar to  
440 observations in numerous other malignancies<sup>19,52,53,58</sup>. *PPMID de novo* germline mutations  
441 have previously not been described in cancer. However, in children with intellectual disability  
442 syndrome, *PPMID* germline mutations have been described to occur in the 5<sup>th</sup> and 6<sup>th</sup> exons.  
443 Notably, an identical c.1528C>T (p.Gln510\*) somatic mutation has been reported in a  
444 malignant melanoma<sup>59</sup>. The vast majorities of reported somatic *PPMID* mutations are located  
445 in exon 6 and result in a truncated WIP1 protein with a proposed higher oncogenic capacity  
446 compared to the full-length WIP1 protein<sup>19,52,60</sup>. We also detected a gene fusion of *PPMID*  
447 and *BCAS3* in a neuroblastoma patient, predicted to generate a C-terminal truncated WIP1  
448 protein and resulting in high levels of WIP1 expression. Similarly, a gene fusion between  
449 *PPMID* and *CIQTNF1* in a Ewing sarcoma patient resulting in high WIP1 expression has  
450 been reported (<https://pecan.stjude.cloud>). Also, a *PPMID* fusion with an intragenic region of  
451 *RPSK6B1* and a *PPMID-ZNS655* fusion has been reported in a diffuse cerebellar glioma  
452 patient and an AML patient, respectively, without any described effects on WIP1 expression  
453 (<https://pecan.stjude.cloud>). Together these observations suggest that the *PPMID* gene is  
454 frequently altered in a variety of cancers and has important functions during tumorigenesis.  
455 To functionally test the importance of *PPMID* in neuroblastoma and medulloblastoma we  
456 investigated the effect of genetic or pharmacological inhibition of WIP1 and demonstrated  
457 that blocking the expression or activity of WIP1 suppressed both neuroblastoma and  
458 medulloblastoma growth *in vivo*. These findings together with similar observations<sup>7,61,62</sup>  
459 further support that WIP1 is important for the development and progression of these neural  
460 tumors.

461 WIP1 is a homeostatic regulator of the DNA damage response (DDR) cascade by  
462 dephosphorylating and inactivation of ATM, ATR, CHK1, CHK2 and DNA-dependent  
463 protein kinase catalytic subunit<sup>63,64</sup>. This and concurrent WIP1-mediated inactivation of p53  
464 will reduce the fidelity of overall DNA repair mechanisms and induce accumulation of DNA  
465 aberrations which is a prerequisite for tumorigenesis. Accordingly, we observed increased  
466 phosphorylation of DDR proteins and H2AX enhancing the sensitivity to irradiation of  
467 *PPM1D* knocked-down neuroblastoma cells. Although mutations of *TP53* are not commonly  
468 detected at time of diagnosis in neuroblastoma, the p53 activity is recurrently compromised in  
469 these tumors<sup>27,65</sup> and p53 inactivation has been shown to contribute significantly to  
470 neuroblastoma development in specific animal models<sup>66,67</sup>. Individuals with the cancer  
471 predisposition syndrome Li-Fraumeni caused by germline mutations of *TP53* may  
472 occasionally develop medulloblastoma<sup>30,68</sup>. Although uncommon, primary somatic mutations  
473 of *TP53* have been linked to the anaplastic medulloblastoma subset<sup>69</sup> and more recently it was  
474 shown that *TP53* mutations have subgroup-specific prognostic implications with particular  
475 enrichment in the childhood SHH-subset linked to a poor clinical outcome<sup>70</sup>. Furthermore,  
476 wild type p53 inactivation in medulloblastoma has been suggested to be related to aberrations  
477 in the p53-ARF pathway including *MDM2* and *PPM1D/WIP1*<sup>14,71</sup>. Three of our investigated  
478 medulloblastoma samples contained *PPM1D* amplification. All three were detected in the  
479 SHH subset in child patients and none had *TP53* mutations, which is frequently observed in  
480 this unfavorable subgroup of medulloblastoma<sup>32</sup>. This further validates WIP1 as an important  
481 player for tumor development in cancers with impaired p53. Also neuroblastoma incidence is  
482 increased in Li-Fraumeni families and in particular the specific common p.R337H mutation  
483 has been shown to increase neuroblastoma development<sup>72,73</sup>.

484

485 In primary neuroblastoma, mutations of genes of the p53 pathway are rare, occurring in  
486 roughly 5% of the cases<sup>74</sup>. By contrast, *TP53* mutations appear to be more frequent in  
487 relapsed neuroblastoma<sup>74</sup> and in neuroblastoma cell lines established at relapse, indicating a  
488 role in the development of a therapy resistant phenotype<sup>71,75,76</sup>. Several additional mechanisms  
489 for p53 inactivation in neuroblastoma have been described including *MDM2* gene  
490 amplification or increased *MDM2* expression mediated by *MYCN* and hypermethylation or  
491 deletions of *CDKN2A*, miR-380-5p mediated repression of p53 expression or p53 inactivation  
492 by the methyltransferase SETD8<sup>4,77-80</sup>. The demonstration that *Ppm1d*-deficient mice  
493 significantly delayed the formation of ERBB2-induced mammary tumors and that *Ppm1d* null  
494 embryonic mouse fibroblast were resistant to transformation by RAS, ERBB2 and c-MYC<sup>81</sup>  
495 prompted us to establish a genetically modified mouse model overexpressing WIP1. These  
496 mice developed tumors of different origin including neuroblastoma after low-dose irradiation  
497 compared to wild-type control mice. The spectrum of observed tumors was highly similar to  
498 tumors observed in p53 deficient mice or p53 deficient mice receiving irradiation<sup>37-40,82-84</sup>.  
499 Interestingly, the tumors developed in our *PPM1D* transgenic mice are phenotypical similar to  
500 mice with *Trp53* mutations compared to *Trp53* knockout mice. Mice with *Trp53* deletions  
501 mainly develop lymphomas and less frequently sarcomas<sup>38,40</sup> whereas *Trp53* mutant mice, in  
502 addition to lymphomas and more frequently sarcoma, also develop carcinomas<sup>39</sup>. This is  
503 similar to the spectrum of tumors observed in our *PPM1D* transgenic mice. Thymic  
504 lymphoma derived from *PPM1D* transgenic mice expresses high levels of wild-type p53 and  
505 WIP1 similar to *Trp53* mutated mice showing high levels of mutated p53<sup>85</sup>.  
506 Also, both the genomic landscape and expression profiles obtained from DNA and RNA  
507 sequencing of *PPM1D*-induced tumors had similar features with regard to DNA mutations  
508 and expression profiles as observed in tumors deriving from p53 impaired mice. Hence,



509 *PPM1D* is an oncogene that induces tumor development by repressing p53 activity leading to  
510 deviant cell cycle arrest, DNA repair and apoptosis.

511

512 Taken together, we have dissected the functional role of *PPM1D* in the neural childhood  
513 tumors neuroblastoma and demonstrated that *PPM1D* is able to induce tumor growth when  
514 cells are subjected to DNA-damaging stress. Hence, *PPM1D* is a *bona fide* oncogene. We also  
515 demonstrate that WIP1 constitute a druggable target in neuroblastoma as well as in  
516 medulloblastoma that should be further developed and evaluated in combinations with current  
517 treatment modalities and investigated for testing in clinical trials given the fact that the  
518 majority of patients with poor prognosis have aberrant expression of WIP1. It may be argued  
519 that targeting DNA repair mechanisms and phosphatase activity in particular seems a  
520 problematic hurdle, but our current data are promising proofs of a principle providing  
521 molecular and pharmacological evidence. Furthermore, genetic instability and accumulation  
522 of genetic aberrations over time is a major obstacle in metastatic and relapsing pediatric  
523 cancers further supporting the potential role and impact of *PPM1D* as a promising therapeutic  
524 target for pediatric patients with high-risk neuroblastoma and medulloblastoma as well as a  
525 wide range of adult cancer patients.

526 **ACKNOWLEDGEMENTS**

527 We wish to thank Karolinska Center for Transgene Technologies (KCTT) for the transgenic  
528 production service. William A. Weiss and Louis Chesler for providing the construct vectors  
529 used for generating transgenic *PPMID*-mice. Clinical Genomics, SciLifeLab, Gothenburg,  
530 Sweden and the Bioinformatics Core Facility platforms at the Sahlgrenska Academy,  
531 University of Gothenburg, Gothenburg, Sweden for assistance with the bioinformatical  
532 analysis of sequencing data. We thank Hjalmar Ståhlberg-Nordegren, Teodora Andonova,  
533 Catarina Träger, Inger Bodin and Susanne Ahlberg for their help and contribution to this  
534 work. Special thanks to Jessica Lundgren and Selameyhune Assefa for their excellent  
535 assistance with the *PPMID*-transgenic animals. We convey our gratitude to Drs. E Appella  
536 and SJ Mazur for useful critical assessment of our manuscript.

537 This work was supported with grants from the Swedish Childhood Cancer Foundation, the  
538 Swedish Research Council, the Swedish Cancer Foundation, the Swedish Foundation for  
539 Strategic Research ([www.nnbcr.se](http://www.nnbcr.se)), Karolinska Institutet, Märta and Gunnar V Philipson  
540 Foundation, and The Cancer Research Foundations of Radiumhemmet.

541 The study sponsors had no role in the design of the study; the collection, analysis, and  
542 interpretation of the data; the writing of the manuscript; or the decision to submit the  
543 manuscript for publication.

544  
545 **Author contributions.** Conceptualization, J.M., J.I.J., and P.K.; Investigation and validation,  
546 J.M., S.F., M.G., G.G.O., D.T., M.W., B.S., M.W., L.H.M.E., N.E., A.K., J.Y.H., A.M., G.T.;  
547 Computational investigation and analysis, J.M., S.F., T.K.O., F.H., C.B., S.R., F.A., N.J., S.  
548 K., Y.S., C.K., J.H., D.G., M.J., M.K., T.M., J.I.J and P.K.; Writing – Original draft, J.M,  
549 N.B., J.I.J. and P.K.; Writing – Review & Editing, J.M., S.F., C.K., J.J.M., M.F., M.K., N.B.,  
550 J.I.J. and P.K.; Resources, K.T., K.S., TM, MF, M.K., J.J.M., G.T., M.J., T.M. and P.K.; Final

551 editing and manuscript approval, All authors; Funding Acquisition & Supervision, J.I.J. and

552 P.K.

553 **Declaration of Interests.** The authors have no conflicts of interest to declare.

554 **STAR METHODS**

555 **Patient-derived tumor material and clinical data**

556 The collection of neuroblastoma (NB) and medulloblastoma (MB) tumors from Swedish  
557 patients was performed after either written or verbal consent was obtained from  
558 parents/guardians according to ethical permits approved by the local Ethics Committee  
559 (Karolinska Institutet and Karolinska University Hospital, registration number 03-736, and  
560 2009/1369-31/1(NB), 2009/1608-31/4(MB)). Fresh tumor tissue was obtained at surgery and  
561 snap-frozen and stored at -80°C until analysis. Informed consent for using tumor samples in  
562 scientific research was provided by parents/guardians of all minors (<18 years of age). In  
563 accordance with the approval from the Ethics Committee the informed consent was either  
564 written or verbal. Clinical data on all patients were obtained from hospital records and/or the  
565 National Solid Tumor Registry (03-736, 03-642, 2009/1608-31/4 and 2009/1369). All patients  
566 were diagnosed, managed and treated according to national and international guidelines and  
567 protocols.

568

569 **Neuroblastoma patient genomics and transcriptomics**

570 *Patient material for genetic analysis*

571 DNA was extracted from frozen tumors or blood using DNeasy blood and tissue kit (Qiagen,  
572 Hilden, Germany) according to manufacturer's protocol and evaluated through absorbance  
573 measurements, fluorometric quantitation and DNA integrity assessment on Agilent  
574 TapeStation (Agilent, Santa Clara, CA).

575

576 *SNP-microarray analysis*

577 Microarray analysis was performed on a consecutive series of samples from an unselected  
578 cohort of 271 neuroblastoma patients using Affymetrix gene mapping arrays (Affymetrix Inc.,

579 Santa Clara, CA). These analyses include the majority of cases from Sweden. All tumors were  
580 staged according to the International Neuroblastoma Staging System (INSS) and INRG  
581 criteria. Handling of the microarrays has been described previously<sup>6,86</sup>.  
582 Primary data analysis was performed using GDAS software (Affymetrix) with *in silico*  
583 normalization against control samples from healthy individuals with further analyses  
584 performed using CNAG (Copy number Analyzer for Affymetrix GeneChip Mapping Arrays)  
585 (Genome Laboratory, Tokyo University; <http://www.genome.umim.jp>). All cases of  
586 chromosomal gain, loss, or amplification were scored for both segmental and numerical  
587 aberrations, including detailed information about the breakpoint positions when applicable.  
588 For practical reasons, all notations of gain and loss were considered in relation to a nominal  
589 tumor karyotype and a chromosomal break in a tumor was defined as a clear change in gene  
590 dose level in the genomic profile. All genomic position annotations are stated based on the  
591 hg19 build (<http://genome.ucsc.edu/>) of the human genome.

592

### 593 *Analysis of PPM1D/17q clonal evolution*

594 Single nucleotide polymorphism (SNP) arrays including the Oncoscan (formalin fixed  
595 paraffins embedded samples) and Cytoscan HD (fresh frozen samples) platforms (Affymetrix  
596 Inc.) were retrieved from and subjected to comparisons of 17q copy number including the  
597 *PPM1D* region (pos 17:60,600,183-60,666,280; GRCh38.p12). Evolutionary trajectories were  
598 formalized as phylogenetic ideograms along the lines described in the original publication. In  
599 all, 100 samples from 23 neuroblastomas from 23 patients were analyzed. Each patient was  
600 assigned to one of three simplified clinical-genetic risk groups, including children <18 months  
601 with only numerical aberrations found in their tumor's phylogenetic stem by SNP array  
602 (low-risk patients), tumors with *MYCN* amplification in the stem (high-risk patients), and  
603 tumors with structural rearrangements in the stem (high-risk patients).

604

605 *Genome sequencing*

606 In total, tumor material from 73 Swedish neuroblastoma patients was subjected to either  
607 whole genome and/or whole exome sequencing. Whole exome sequencing was performed  
608 through paired-end sequencing on Illumina platforms (Illumina, San Diego, CA) after  
609 enrichment with Agilent SureSelect All Exome enrichment kit (Agilent technologies, Santa  
610 Clara, CA) on DNA for 18 tumor/normal pairs and additional 20 neuroblastoma tumors  
611 without corresponding constitutional DNA. Alignment against hg19 was performed using  
612 BWA with GATK local realignment followed by SNV calling using SNPeff. Whole genome  
613 sequencing (WGS) was performed on tumor DNA and corresponding constitutional DNA  
614 extracted from blood for 35 neuroblastoma patients for an average coverage of at least 60X  
615 for tumor and 30X for constitutional DNA using Illumina xTen instrumentation (Illumina,  
616 San Diego, CA, USA) located at NGI/Clinical Genomics, SciLife Laboratories, Stockholm,  
617 Sweden. Read trimming, mapping to the human reference genome hg19 and variant calling  
618 were performed using CLC Genomics Workbench 8.0.3 software (CLC, Aarhus, Denmark).  
619 Only high quality called variants with a minimum 10% allele frequency and a total read  
620 coverage of ten were considered for further analysis. Somatic variants with allele frequency  
621 above 3% in either 1000 genomes, Exome Aggregation Consortium (ExAC), Cambridge, MA  
622 (<http://exac.broadinstitute.org>) or NHLBI Exome Sequencing Project  
623 (<http://evs.gs.washington.edu/EVS/>) were discarded as well as excluding all synonymous  
624 variants or variants in non-coding regions except those affecting canonical splice sites.  
625 Remaining variants were assessed manually through the Integrative Genomics Viewer  
626 (IGV)<sup>87</sup> for removal of calls due to mapping artifacts and paralogs.  
627 For tumors (exome) sequenced without corresponding DNA from constitutional tissue, a  
628 systematic filtering approach was used to identify critical variants. This was done by removal

629 of common variants, e.g. present in dbSNP v138 or showing an allele frequency above 0.1 in  
630 either 1000 genomes, Exome Aggregation Consortium (ExAC), Cambridge, MA  
631 (<http://exac.broadinstitute.org>), NHLBI Exome Sequencing Project  
632 (<http://evs.gs.washington.edu/EVS/>) or SweFreq (<https://swegen-exac.nbis.se/>). Variants were  
633 annotated based on RefSeq and functional impact was predicted by SIFT and PolyPhen.  
634 FusionCatcher was applied to discover *PPM1D*-containing fusion transcripts in the National  
635 Cancer Institute TARGET dataset comprising paired-end RNA sequenced neuroblastoma  
636 patient samples (dbGap Study Accession:phs000218.v16.p6).

637

### 638 *Case description, germline PPM1D mutation detection*

639 The patient was born by a spontaneous delivery at gestational week 37+4 after an uneventful  
640 pregnancy. His birth weight was 2945 gr. He was diagnosed with a bicuspid aortic valve,  
641 which was also present in the maternal grandmother and two of her siblings. The family  
642 history was negative for cancer with onset before age 50. In the first year of life he had reflux  
643 for which feed thickener and proton pump inhibitors were described. Psychomotor  
644 development was above average with early speech development, early recognition of  
645 numbers, letters and colors and walking shortly after his first birthday. At 26 months of age he  
646 presented with hemifacial palsy and clinical, radiological and pathological evaluation  
647 revealed a metastatic stage 4 (INSS) intermixed ganglioneuroblastoma of the left adrenal  
648 gland with bone metastases in the skull base, in the lumbosacral spine with intraspinal  
649 extension and expansion to the left-sided ilium and diffuse bone marrow infiltration. The  
650 tumor was negative for *MYCN* amplification and negative for LOH of chromosome 1p.  
651 Therapy consisted of induction chemotherapy, surgical resection, high dose chemotherapy,  
652 autologous stem cell transplantation and radiotherapy which resulted in very good partial  
653 clinical remission. Treatment was intended to be completed with immune therapy but

654 evaluation before starting this treatment revealed refractory neuroblastoma in the iliac bone,  
655 which was irradiated and again three cycles of chemotherapy (irinotecan/temozolomide) were  
656 given. The evaluation that followed showed diffuse leptomeningeal metastases indicative of  
657 progressive disease. Palliative treatment was started and the boy died at 3 years and 7 months  
658 of age. During treatment it was noted that the boy had a remarkably high pain threshold.  
659 Shortly after his cancer diagnosis the parents worried about a possible increased risk for  
660 neuroblastoma in the younger brother of the proband and a clinical geneticist was consulted.  
661 Fetal fingers pads and a relatively short stature (at cancer diagnosis his age-adjusted length  
662 and head circumference were at -1.5 SD) were observed in the proband, but otherwise no  
663 dysmorphisms or other notable features were present. Germline *PHOX2B* and *ALK* analysis  
664 revealed no mutations. Several years later, the brother developed subcutaneous lesions on his  
665 right forearm at three years of age. These were resected and were hard to classify by the  
666 pathologist, with benign myofibroblastic proliferation as most likely diagnosis. The parents  
667 again consulted a clinical geneticist, in the light of a possible genetic predisposition  
668 explaining the tumors in their children. Whole exome sequencing was performed on blood  
669 derived DNA of both children and the parents. This revealed a heterozygous c.1528C>T  
670 (p.Gln510\*) mutation in *PPMID* in the proband who died of neuroblastoma. This mutation  
671 was absent in his brother and his parents. Identification of this mutation in neuroblastoma  
672 derived DNA confirmed the germline status of this mutation and excluded that the mutation  
673 was restricted to blood and resulted from chemotherapy which has recently been shown for  
674 *PPMID* mutations<sup>88</sup>.

675  
676 The patient described here has several features in overlap with patients with *PPMID*  
677 intellectual disability syndrome. He had relative short stature, reflux in early childhood, small  
678 hands (hand length -2,5 SD at age 9 months), and a high pain threshold. Strikingly,



679 developmental delay was definitely absent in this child. Despite intensive multimodal  
680 treatment for his high-risk neuroblastoma, he seemed to have an above average intelligence,  
681 which was in concordance with the education levels of his parents and grand parents.  
682 Additionally, deep phenotyping revealed overlapping behavioral problems (ASD, ADHD, and  
683 anxiety disorders), hypotonia, broad-based gait, facial dysmorphisms, and periods of fever  
684 and vomiting. This patient, with the first de novo germ-line *PPMID* mutation linked to  
685 cancer, showed a facial phenotype that significantly correlated ( $p=0.0164$ , **Supp Figure S1F**)  
686 with eleven previous reported patients with de novo germ-line truncating *PPMID* mutations  
687 of the 5<sup>th</sup> or 6<sup>th</sup> exon and intellectual disability<sup>24</sup>.

688

#### 689 *Gene expression analysis*

690 Patient cohort and methodology of RNA-seq data analysis pipeline are extensively described  
691 in<sup>89</sup>. We used gene expression data of 498 neuroblastoma patients from seven countries.  
692 According to the Neuroblastoma Risk Group (INRG) classification system<sup>26</sup> we classified  
693 patients with *MYCN* amplifications and patients with a metastatic disease and older than 18  
694 months at diagnosis as high-risk patients ( $n=176$ ). Events were defined according to a revised  
695 version of the International Neuroblastoma Response Criteria<sup>90</sup>.

696 RNA-seq gene expression analyses have been done using the MAGIC-AceView pipeline as  
697 previously described<sup>89</sup>. Copy number data for *PPMID* was derived from array comparative  
698 hybridization (aCGH);<sup>91</sup>, whole exome sequencing and whole genome sequencing analyses<sup>74</sup>.

699

#### 700 *Statistical analyses*

701 Gene expression of *PPMID* was investigated displayed on the gene level (*PPMID*) or  
702 transcript level for two selected transcript variants (AceView annotation, as a result of the

703 analysis, i.e. *PPMID.aAug10* and *PPMID.bAug10*, corresponding to transcripts  
704 ENST00000305921 and ENST00000392995 respectively).

705 *PPMID* expression in defined NB subgroups (according to INRG high-risk status, INSS  
706 stage, amplification status of MYCN, age, CN status of *PPMID* on chromosome 17) was  
707 displayed in Tukey box-and-whisker plots (box range: inter-quartile range, whiskers: 1.5x  
708 IQR). Where appropriate, either Mann–Whitney–Wilcoxon or Kruskal-Wallis tests were  
709 performed to investigate differences in expression of two or more analyzed groups,  
710 respectively. Pearson correlation analyses have been applied to investigate correlation  
711 between *PPMID* expression and copy number.

712

713 To investigate the prognostic value of *PPMID* expression, optimal cutpoint expression values  
714 separating the cohort into *PPMID*-high and *PPMID*-low groups that correlate best with  
715 outcome in terms of event-free survival (EFS; recurrence, progression and death from disease  
716 were considered as events), and overall-survival (OS) were calculated by means of maximally  
717 selected rank statistics (maxstat package in R v3.4.3)<sup>92,93</sup> in training sets. Differences in  
718 survival of *PPMID* high and low-expressing subgroups according to dichotomization with the  
719 established cutpoints was then tested by Mantel-Cox (log-rank) tests in corresponding  
720 validation sets. For this procedure, equally sized training and validation subsets (n=296) were  
721 randomly sampled from the entire cohort (n=498). Resampling was done 1000 times and the  
722 mode of those established cutpoint values which passed  $p < 0.05$  in maxstat<sup>92,93</sup> as well as in  
723 the log-rank test was eventually selected to define *PPMID*-high and *PPMID*-low expressing  
724 subgroups (this procedure was independently done for EFS and OS). Subsequently, Kaplan-  
725 Meier survival estimates for the entire cohort were calculated and displayed from the time of  
726 diagnosis and clinical outcome of respective subgroups was compared using the log-rank test.

727

728 *Principal Components Analysis (PCA) on expression data*

729 Raw data expression: CEL-files (HU133A chips from Affymetrix) from 30 primary  
730 neuroblastoma cases from two published microarray studies<sup>28,29,94</sup> were pre-processed using  
731 gcRMA normalization in Bioconductor for R 2.9.2 (library BioC 2.4). For each gene, the  
732 mean expression level from probe-sets was calculated, resulting in 8105 genes/variables<sup>94</sup>.  
733 Principal Components Analysis (PCA) was performed on the pre-processed McArdle/Wilzén  
734 expression data set using Omics Explorer 3.2 from Qlucore ([www.qlucore.se](http://www.qlucore.se)). Genes with the  
735 lowest variance were filtered out (variance cut-off =0.4), displaying a PCA plot based on 716  
736 genes/variables and 30 samples/cases according to the method previously described<sup>94</sup>.  
737 Samples/cases were joined to their nearest neighbor using Euclidean distances, and they  
738 subdivided into four separate groups. The differential expression of *PPM1D* between  
739 molecular subgroups was calculated by fold change and change and Student's t-test (2-sided  
740 comparison, unequal variance).

741

742 **Gene expression data profiling for medulloblastoma**

743 All mRNA expression data of 446 human medulloblastoma and 18 normal cerebellum  
744 samples have been generated by Affymetrix U133plus2.0 arrays. Gene expression data come  
745 from public sources deposited in GEO (<http://www.ncbi.nlm.nih.gov/geo>)<sup>95-99</sup> or have been  
746 generated at the German Cancer Research Center DKFZ in Heidelberg. The MAS5.0  
747 algorithm of the GCOS program (Affymetrix Inc) was used for normalization of the  
748 expression data. All data have been analyzed using the R2 program for analysis and  
749 visualization of microarray data (<http://R2.amc.nl>). Anova tests were used to test whether  
750 there is a significant differential expression of *WIP1* between the groups shown in the plots.

751

752 **Cell culture and reagents**

753 Twenty-two human cell lines of different origin were used throughout the study: eleven  
754 neuroblastoma cell lines (IMR-32, Kelly, NB1691, SH-EP, SH-SY5Y, SK-N-AS, SK-N-  
755 BE(2), SK-N-DZ, SK-N-FI, SK-N-SH, TR14), eight medulloblastoma/sPNET cell lines  
756 (DAOY, D283MED, D384MED, D425MED, D458MED, MEB-MED8A, PFSK-1, UW228-  
757 3), two breast cancer cell lines (MCF-7, BT-474), and one human fetal lung fibroblast cell  
758 line (MRC-5). In addition, one neural multipotent progenitor cell line from mouse (C17.2)  
759 was used. The cell lines were purchased from ATCC, except D384MED, D425MED,  
760 D458MED, PFSK-1, MEB-MED8A and UW228-3 that were kindly provided by Dr. M.  
761 Nistér (Karolinska Institutet), NB1691 and TR14 by Dr. D. Tweddle (Newcastle University)  
762 and C17.2 by Dr. T. Ringstedt (Karolinska Institutet). The cell lines were cultured in RPMI  
763 1640 (IMR-32, Kelly, NB1691, SH-EP, SK-N-AS, SK-N-BE(2), SK-N-DZ, SK-N-FI, SK-N-  
764 SH, TR14, PFSK-1 and MRC-5), Dulbecco's modified Eagle's medium (DMEM; MEB-  
765 MED8A, C17.2, BT-474), Minimum Essential Media (MEM; DAOY, D283MED,  
766 D384MED), Richter's improved MEM with zinc/DMEM (IMEMZO/DMEM; D425MED and  
767 D458MED), DMEM/F12 (SH-SY5Y and UW228-3). Medium was supplemented with 10%  
768 (or 15% for C17.2, MEB-MED8A, D425MED and 20% for D384MED) heat-inactivated fetal  
769 bovine serum (FBS), 2 mM L-glutamine, 100 IU/ml penicillin G, and 100 µg/ml streptomycin  
770 (Life Technologies Inc., Stockholm, Sweden) at 37°C in a humidified 5% CO<sub>2</sub> atmosphere.  
771 To the MCF-7 and D384MED media, 1 mM sodium pyruvate and 1 mM non-essential amino  
772 acids solution (Gibco) were also added. All media were purchased from Gibco BRL.

773

774 The identities of the cell lines were verified by short tandem repeat genetic profiling using the  
775 AmpFlSTR® Identifier™ PCR Amplification Kit (Applied Biosystems) in December 2015  
776 and all cell lines were used in passages below 25. All experiments were executed in Opti-  
777 MEM (GIBCO) supplemented with glutamine, streptomycin and penicillin (HyClone Thermo

778 Fisher Scientific), except transfection experiments, which were performed without antibiotics.

779 *PPM1D*-knockdown SK-N-BE(2) cells and corresponding control cells were cultured in

780 selection media (standard media according to above supplemented with 0,5-2 µg/mL

781 puromycin).

782

783 RITA and Nutlin-3 were purchased from Cayman Chemical Company and Sigma-Aldrich,

784 respectively, and SL-176 and SPI-001 were synthesized as described previously<sup>42,44</sup>. RITA

785 and Nutlin-3 were dissolved in DMSO (Sigma-Aldrich), while SL-176 was dissolved in a mix

786 of DMSO (33%) and ethanol (67%). Further dilutions were made in Opti-MEM or PBS. The

787 DMSO concentration did not exceed 1% v/v in any experiment. For the *in vivo* studies, SL-

788 176 was dissolved in a mix of DMSO (33%) and ethanol (67%) and further diluted in sodium

789 chloride 0.9%.

790

### 791 **Short hairpin RNA (shRNA)**

792 For the transfections, cells were seeded in 6-well plates, left to attach and transfected using

793 Lipofectamine 2000 (Thermo Fisher Scientific) with 4 µg of four pre-designed shRNAs

794 (GIPZ Lentiviral) targeting human *PPM1D* (172\_0502-F-1 (Clone ID: V2LHS\_262759),

795 172\_0556-D-7 (Clone ID: V2LHS\_27794), 172-0447-C-2 (Clone ID: V2LHS\_27798) and

796 172\_0496-G-2 (Clone ID: V2LHS\_262763), Dharmacon) and non-silencing pGIPZ Lenti

797 Control shRNA (#RHS4346, Dharmacon). Cells were incubated for 6 hours in the

798 transfection media and then replaced with corresponding culture medium. After 24-48 hours,

799 cells were subjected to further analyses. For generating stable transfections, cells were grown

800 in selective medium (0,5-2 µg/mL puromycin selection).

801

### 802 **Viability assays**

803 For evaluation of cytotoxic effect on cell viability, we used the fluorometric microculture  
804 cytotoxicity assay as previously described<sup>100</sup> or the colorimetric formazan-based assay WST-1  
805 (Roche), according to the manufacturer's description. Briefly, cells were seeded into 96 well  
806 plates (5 000 – 10 000 cells/well), left over night and treated with drugs the following day.  
807 After 72 hours, WST-1 reagent was added and absorbance was measured at 450 nm. All  
808 concentrations were tested in triplicate. The mean out of at least three independent  
809 experiments is reported.

810  
811 To determine colony formation, 100 cells/well in the non-exposure experiments and 300  
812 cell/well in the irradiation experiments were seeded in 60 mm cell+ culture plates (Sarstedt,  
813 Sweden) and allowed to attach for 24 h before exposure to ionizing radiation (Cobolt<sup>60</sup> source)  
814 at 2 or 4 Gy, when applicable. After 10-14 days of incubation in medium, cells were washed,  
815 fixed in formaldehyde (4%), stained with Giemsa (Gibco, BRL) and colonies (1 clone>50  
816 cells) with 50% plate efficiency were manually counted. The mean out of at least three  
817 experiments is reported.

818 Cell viability of *PPM1D* silencing was assessed by the trypan blue exclusion assay. In brief,  
819 cells ( $4.4 \times 10^4$  MEB-MED8A cells/well and  $2.5 \times 10^4$  SK-N-BE(2) cells/well respectively),  
820 were seeded and transfected in 6-well plates; 3 wells for each time point per cell line and  
821 transfection group, cultured for 6 days. Cells were stained with 0.4% trypan blue (GIBCO,  
822 BRL) and viable (unstained) cells were counted daily to determine the total number of living  
823 cells. The mean out of three experiments is reported.

824

#### 825 **Irradiation of human cancer cell lines**

826 SK-N-BE(2), SH-SY5Y, DAOY, Med8a and MCF-7 cells were seeded into six-well cell  
827 culture plates (300 000 – 500 000 cells/well) in standard medium with 10% FBS and allowed

828 to attach overnight, with exception for Med8a cells growing in suspension. Prior to treatment,  
829 60-80% confluency was observed. Medium was removed and replaced with OptiMEM  
830 containing a SL-176 concentration equivalent to the corresponding IC<sub>50</sub> value for each cell  
831 line (0.5 - 1.3 μM). Med8a cells were directly seeded in OptiMEM containing SL-176 at IC<sub>50</sub>.  
832 After 1h incubation, cells were irradiated with 4 Gy (Cobolt<sup>60</sup> source) while kept on ice, after  
833 which incubation at 37°C continued for the time indicated (0, 4, 8, or 24 hours). Cells were  
834 harvested using Cell Dissociation Solution Non-enzymatic (Sigma-Aldrich). For the  
835 irradiation of the stably transfected SK-N-BE(2) neuroblastoma cell lines (*PPM1D* ShRNA  
836 and control ShRNA), 500 000 cells/well were seeded into six-well cell culture plates as  
837 described above, allowed to attach overnight and irradiated with 2 Gy and 4 Gy respectively  
838 and harvested after 48 and 72 hours. SK-N-BE(2) non-transfected cells were treated with  
839 40mM cisplatin, used as a positive control for double-strand DNA breaks.

840

#### 841 **Western blot**

842 Protein extraction, determination of protein content, SDS-PAGE under reducing conditions,  
843 electroblot and immunoreaction detection were carried out as previously described<sup>101</sup>. Briefly,  
844 total proteins were extracted using RIPA buffer (Thermo Fisher Scientific) supplemented with  
845 Halt™ Protease and Phosphatase Inhibitor Cocktail (Thermo Fisher Scientific). 30 μg (for cell  
846 lines) and 50 ug (for mouse tissue) of total protein were resolved by reducing SDS-PAGE and  
847 transferred onto a nitrocellulose membrane. The membranes were blocked with 5% non-fat  
848 milk or BSA 5% in TBS-T buffer, and incubated with the corresponding antibodies (**Table**  
849 **S7**). Chemiluminescence visualization of antibodies was performed with Amersham™  
850 ECL™ Prime Western Blotting Detection Reagent (GE Healthcare). Visualization and  
851 imaging of signal was performed with ImageQuant LAS 4000 (GE Helathcare).

852

### 853 **Quantitative real-time RT-PCR analyses**

854 The mRNA expression levels were quantified using TaqMan® technology on an ABI PRISM  
855 7500 sequence detection systems (PE Applied Biosystems). Primers were selected from the  
856 Assay-on-Demand products (Applied Biosystems), including human *PPM1D*  
857 (Hs00186230\_m1), and 18S ribosomal RNA (Hs99999901\_s1). All gene expression assays  
858 was designed with an FAM reporter dye at the 5' end of the TaqMan MGB probe, and a non-  
859 fluorescent quencher at the 3' end of the probe. High capacity RNA-to-cDNA kit (Applied  
860 Biosystems) was used to synthesize cDNA from 100 ng of RNA per sample. The PCR  
861 reaction was done in a total reaction volume of 25 µl containing 1 x TaqMan® Universal PCR  
862 Master Mix, 1 x TaqMan® Gene Expression Assays (Applied Biosystems) and 10 µl of  
863 cDNA from each sample as a template, in MicroAmp optical 96-well plates covered with  
864 MicroAmp optical caps (Applied Biosystems). Firstly, samples were heated for 2 min at 50°C  
865 and then amplified for 40 cycles of 15 s at 95°C and 1 min at 60°C. A standard curve was  
866 generated for relative quantification with cDNA synthesized from 1 µg RNA of the cell lines  
867 combined. For every sample the amount of target mRNA was normalized to the standard  
868 curve and normalized to 18S ribosomal RNA expression. All experiments included a no  
869 template control and were performed in triplicate.

870

### 871 **CRISPR-Cas9 loss of function screening**

872 The DepMap Public CRISPR (Avana) 18Q3 gene dependency dataset including 485 cancer  
873 cell lines (whereof 15 neuroblastom and 7 medulloblastoma cell lines) as well as mutation call  
874 dataset was downloaded from the Broad Institute Cancer Dependency Map  
875 (<https://depmap.org/portal/>) and used for analysis of *PPM1D* and *TP53* genetic  
876 vulnerabilities<sup>102</sup>. Visualization and analysis of enriched functional processes associated to



877 *TP53*-dependency was done in the Search Tool for the Retrieval of Interacting Genes/Protein  
878 (STRING) database<sup>103</sup>.

879

### 880 **Flow cytometry**

881 Phosphorylation of H2AX was assayed with Alexa Fluor 647-conjugated anti-phospho-H2AX  
882 (2F3, Biolegend, San Diego, CA, USA) 24 and 72 hours on cells that were transfected with  
883 *PPM1D*-shRNA 172\_0502-F-1 and control shRNA, respectively. A minimum of 10 000  
884 events were recorded on Becton-Dickinson FACSCalibur or LSR II flow cytometers (BD  
885 Biosciences, San Jose, CA, USA). Data analysis was performed using the Cell Quest  
886 software.

887

### 888 **Human tissue samples for immunohistochemistry**

889 Neuroblastoma and medulloblastoma tumor tissue were obtained from the Karolinska  
890 University Hospital according to the ethical approval from the Stockholm Regional Ethical  
891 Review Board and the Karolinska University Hospital Research Ethics Committee (approval  
892 ID 2009/1369-31/1 and 03-736). Informed consent (written or verbal) was provided by the  
893 parents or guardians for the use of tumor samples in research. Samples were collected during  
894 surgery, snap-frozen in liquid nitrogen and stored at -80°C until further use. Twenty-seven  
895 neuroblastoma samples derived from children of different ages and all clinical stages,  
896 including different biological subsets<sup>104</sup>, were analyzed.

897

### 898 **Immunohistochemistry**

899 Formalin-fixed and paraffin-embedded human tissue sections were deparaffinized in xylene  
900 and graded alcohols, hydrated and washed in phosphate-buffered saline (PBS).

901 After antigen retrieval in sodium citrate buffer (pH 6) in a microwave oven, the endogenous  
902 peroxidase was blocked by 0.3 % H<sub>2</sub>O<sub>2</sub> for 15 min. Sections from human neuroblastoma  
903 were incubated overnight at 4 °C with a primary antibody against PPM1D (ab31270, Abcam).  
904 Similarly, tissue sections from xenograft tumors were incubated with an anti-Ki-67 antibody  
905 (clone SP6, Neomarkers, Fremont), anti-cleaved caspase-3 (ASP175) (#9579; Cell Signaling  
906 Technology) and anti phospho-Histone h2ax (Ser139) (#9718 Cell Signaling Technology),  
907 respectively. As a secondary antibody, the anti-rabbit-horseradish peroxidase (HRP)  
908 SignalStain Boost IHC detection kit was used (Cell Signal Technology; #8114). A matched  
909 isotype control was used as a control for nonspecific background staining (not shown).

910

## 911 **Animal studies**

### 912 *Ethical permits*

913 The animal experiments were approved by the regional ethics committee for animal research  
914 in Northern Stockholm, appointed and under the control of the Swedish Board of Agriculture  
915 and the Swedish Court. All animal experiments were in accordance with national regulations  
916 (SFS 1988:534, SFS 1988:539, and SFS 1988:541). For specific approval numbers, please  
917 refer to the sections below.

918

### 919 *Xenograft studies*

920 Immunodeficient nude mice (female 4-6 weeks old, NMRI-nu/nu, Scanbur, Stockholm,  
921 Sweden) were used for xenograft studies (ethical approvals N304/08 and N391/11). The mice  
922 were kept under specific pathogen-free conditions at a maximum of six individuals per cage  
923 and given sterile water and food *ad libitum*. All mice were treatment-naïve at the start of the  
924 experiment.

925

926 Under general anesthesia, each mouse was injected subcutaneously on the rear flank with  $10 \times$   
927  $10^6$  SK-N-BE(2) neuroblastoma cells or  $17 \times 10^6$  DAOY medulloblastoma cells. In the  
928 knockdown experiment, mice were inoculated bilaterally with  $5 \times 10^6$  SK-N-BE(2) cells  
929 (clone d) that were knocked down for *PPM1D* (n=8) and SK-N-BE(2) control cells (clone C)  
930 that were transfected with non-silencing shRNA (n=15) respectively and followed until the  
931 tumor reached 0.1 mL.

932 In the drug treatment experiments, mice with SK-N-BE(2) xenografts were randomly  
933 assigned to three different treatment groups when the tumor reached  $\geq 0.1$  mL. For twelve  
934 days, mice received either daily intraperitoneal injections (i. p.) of SL-176 at 3 mg/kg (n=8) or  
935 0.5 mg/kg (n=6), or no treatment (n=6). The mean tumor volume at the start of treatment was  
936 0.115 mL.

937 Mice bearing DAOY xenografts were randomly divided into two different groups, and  
938 treatment commenced at tumor volume  $\geq 0.12$  mL. Mice received either 3 mg/kg SL-176 as  
939 daily i. p. injection for 21 days (n=8), or no treatment (n=7). The mean tumor volume at the  
940 start of treatment was 0.124 mL.

941 In all xenograft-bearing mice, tumors were measured every day and the animals were  
942 monitored for signs of toxicity including weight loss. The tumor volume was estimated as  
943 (width)<sup>2</sup> x length x 0.44. At sacrifice, tumors were dissected and either frozen or fixed in  
944 formaldehyde, for subsequent analyses.

945

#### 946 *WIP1-overexpressing mouse model*

947 Transgenic WIP1-overexpressing mice were generated by pronuclear injection with random  
948 integration of a *PPM1D*-transgenic vector construct, carried out at Karolinska Center for  
949 Transgene Technologies (KCTT) and granted according to ethical approval numbers N251-12  
950 and N42-14.

951 The construct consisted of rat tyrosine hydroxylase (TH) promoter, meant to direct expression  
952 towards the neural crest; rabbit beta-globin intron was used to enhance expression; and cDNA  
953 for the human *PPM1D* gene. Herpes simplex virus (HSV) thymidine kinase gene sequence  
954 was used as a transcription terminator (**Figure S4A**). The plasmid was kindly provided by  
955 Prof. William Weiss (University of California, San Francisco, California, USA) and has  
956 previously been used to generate a transgenic mouse model with targeted *MYCN* expression  
957 giving rise to murine neuroblastoma<sup>67</sup>. In the current study, however, *MYCN* cDNA was  
958 substituted for *PPM1D* cDNA (MGC Human *PPM1D* Sequence-Verified cDNA, Clone Id:  
959 5167004, Dharmacon) to complete the construct (GENEWIZ, South Plainfield, NJ, USA).

960

961 The linearized and purified construct was diluted to 1.5 ng/ul in microinjection buffer (10 mM  
962 Tris-HCl, pH7.4, 0.1 mM EDTA) and injected into the pronucleus of C57BL/6Ncrl zygotes  
963 using a Nikon TE200 microinjection system with Narishige NT-88NEN micromanipulators  
964 and a Warner Instruments PLI-100A pico-liter injector. The microinjected embryos were  
965 transferred into the oviducts of pseudopregnant CrI:CD1(ICR) female mice using standard  
966 surgery techniques and ear biopsies from the resulting 55 offspring were screened for the  
967 presence of the *PPM1D* transgene by PCR using

968 forward primer: 5'-CTGGTCATCATCCTGCCTTTCT-3' and

969 reverse primer: 5'-GCCTTCCCCGAGACTTCG-3' (Sigma-Aldrich). 6 transgenic animals  
970 were found of which 4 founder animals were further established based on their ability to pass  
971 on the human *PPM1D*-transgene to their offspring.

972

973 In order to achieve a more tumor-permissive genetic background, these four transgenic  
974 mouse-lines were backcrossed with 129X1/SvJ mice, aiming for ten generations of  
975 backcrossing which should result in approximately 100% 129X1/SvJ background.

976 Backcrossing was carried out in accordance with ethical permit number N641-12. Throughout  
977 breeding, mice were monitored closely for development of palpable abdominal tumors or  
978 other disease manifestations up to 548 days (1.5 years) of age.

979

#### 980 *Irradiation of mice*

981 Using a linear accelerator (X-RAD 320, Biological Irradiator, North Branford, CT, USA) with  
982 a dose rate of 0.95 Gy/min at 320 KV and a radiation field of 20 x 20 cm, *PPMID*-transgenic  
983 mice from three established transgenic lines and their wild-type littermates resulting from  
984 heterozygous breeding pairs with different degrees of 129X1/SvJ strain background (3 to 7  
985 generations of backcrossing from C57BL/6N to 129X1/SvJ background) were subjected to  
986 whole-body irradiation at a single sublethal dose of 4.5 Gy (ethical approval N290-15), after  
987 which they were monitored daily in their usual pathogen-free environment. Mice were  
988 exposed to irradiation at different ages (1 to 314 days old). Littermates were always irradiated  
989 simultaneously. The mice were followed up to 548 days (1.5 years) of age.

990

#### 991 *Immunohistochemistry of transgenic mouse tissue samples*

992 Formalin-fixed and paraffin-embedded transgenic mouse tissue sections were deparaffinized  
993 in xylene and graded alcohols, hydrated and washed in phosphate-buffered saline (PBS).  
994 After antigen retrieval in sodium citrate buffer (pH 6) in a microwave oven, endogenous  
995 peroxidase activity blocked by 0.3 % H<sub>2</sub>O<sub>2</sub> for 15 min. Biotin blocking was preformed using  
996 an avidin/biotin blocking kit (Vector Laboratories). All washes and dilutions were performed  
997 in PBS containing 0.1% saponin. Sections were incubated with an anti-Ki-67 antibody (clone  
998 SP6, ab16668, abcam), anti-B220 antibody (clone RA3-6B2, R&D Systems, Minneapolis,  
999 MN, USA), or anti-CD3 antibody (SP7, Abcam, Cambridge, UK) containing 3% human  
1000 serum overnight at room temperature. After blocking with 1% goat serum for 15 min sections

1001 were incubated with a biotin-conjugated secondary antibody (goat anti-rabbit IgG or goat anti  
1002 rat IgG, Vector laboratories) containing 1%goat and 3% human serum at room temperature  
1003 for 30 min. For detection an ABC complex (Elite ABC kit, Vector laboratories) was used  
1004 before the sections were developed using diaminobenzidine (DAB Peroxidase Substrate kit;  
1005 Vector Laboratories) as chromogen. Sections were counterstained with Mayer's hematoxylin  
1006 (Histolab). For immunofluorescence detection of CD3 positive cells sections were incubated  
1007 with anti-CD3 antibody (SP7, Abcam, Cambridge, UK) in 4% goat serum overnight at +4C  
1008 following incubation with secondary Goat anti-rabbit-Alexa Fluor 488 (Thermo fisher  
1009 Scientific). Histological assessment of the transgenic mouse tissues was performed by a  
1010 pathologist. For full list of antibodies used for immunohistological analyses see **Table S7**.

1011

#### 1012 *Whole exome sequencing, variant calling and copy number alterations in mice*

1013 Whole exome sequencing (WES) was performed on DNA from totally 24 samples; 15  
1014 independently developed thymic lymphomas and thymus from nine controls. The controls  
1015 were divided in to three different groups corresponding to a) irradiated *PPMID*-transgenes, b)  
1016 irradiated wild type and c) non-irradiated wild type. In respective control group three mice,  
1017 one from each strain, were subjects for sequencing.

1018 WES was performed by Otogenetics (Otogenetics Corporation, Atlanta, GA, USA) through  
1019 pair-end sequencing on Illumina platforms (Illumina, San Diego, CA) after enrichment with  
1020 Agilent SureSelectXT Mouse All Exon (Agilent technologies, Santa Clara, CA) reaching an  
1021 average coverage of 80X (range 47,5-99,2X) (**Table S5**). Read trimming, mapping to the  
1022 mouse reference genome mm10 and variant calling were performed using CLC Genomics  
1023 Workbench 5.0 software (CLC, Aarhus, Denmark). Somatic calling of lymphoblastic tumors  
1024 and irradiated controls was done using the combined sequence from the three non-irradiated  
1025 wild type mice as normal control. Only high quality called variants with a minimum 10%

1026 allele frequency and a total read coverage of ten were considered for further analysis. All  
1027 synonymous variants or variants in non-coding regions except those affecting canonical splice  
1028 sites were discarded. Remaining variants were assessed manually through the Integrative  
1029 Genomics Viewer (IGV)<sup>87</sup> for removal of calls due to mapping artifacts or paralogs.  
1030 Calling and visualization of copy number alterations was done using the software Control-  
1031 Free (control-FREE Copy Number Caller) that generates ratios from normalized read  
1032 distribution between tumor and normal followed by visualization in a Shiny application as  
1033 described previously<sup>105</sup>.

1034

### 1035 *RNA sequencing of mouse tumors*

1036 Bulk RNA sequencing (RNA-seq) was performed on extracted RNA in a total of 24 samples;  
1037 10 controls (thymic tissue from healthy mice) and 14 thymic lymphomas. As with mouse  
1038 tumor WES, controls were divided into three groups based on irradiation status and genotype:  
1039 wild-type non-irradiated (n = 3), *PPM1D*-transgenic non-irradiated (n = 3), wild-type  
1040 irradiated (n = 2), *PPM1D*-transgenic irradiated (n = 2). Total RNA extraction, library  
1041 preparation and sequencing were performed by Otogenetics (Otogenetics Corporation,  
1042 Atlanta, GA, USA) through paired-end sequencing on Illumina HiSeq 2500 (Illumina, San  
1043 Diego, CA) after mRNA purification using the TruSeq Stranded cDNA kit. Read length was  
1044 100-125 bp for all samples.

1045 Samples were aligned to the mm10 reference genome using STAR in 2-pass mode<sup>106</sup>. Aligned  
1046 reads were quantified using htseq-count<sup>107</sup> and differential gene expression analysis was  
1047 performed using the R/Bioconductor package DESeq2<sup>108</sup>. After having converted mouse  
1048 Ensembl gene IDs to human orthologs using the R package *gOrth*, gene set enrichment  
1049 analysis was performed using the GSEA software from Broad institute<sup>109,110</sup> and the Hallmark  
1050 collection of gene sets from the Molecular Signatures Database, MSigDB, version 6.2<sup>111</sup>.

1051

1052 **Statistical analysis**

1053 Statistical analyses were done with GraphPad Prism software (GraphPad Software, San  
1054 Diego, CA). The IC<sub>50</sub> values (inhibitory concentration 50%) were determined from log  
1055 concentrations-effect curves using non-linear regression analysis. T test was used to compare  
1056 means between two groups and for comparison of three or more groups, one-way ANOVA  
1057 followed by Bonferroni multiple-comparisons post-test were used. Survival analysis was  
1058 examined with log-rank test and Fisher's test was used to test significance of association  
1059 between the two categories. Correlations were assessed with Pearson test/Spearman non-  
1060 parametric test. P<0.05 was considered significant and all tests were two-sided. Survival  
1061 curves were calculated using the Kaplan-Meier method. Regarding statistical methods for  
1062 genomics and transcriptomics studies, please refer to the corresponding methods section.



1063 **References**

- 1064 1. Huether, R. *et al.* The landscape of somatic mutations in epigenetic regulators across 1,000  
1065 paediatric cancer genomes. *Nat Commun* **5**, 3630 (2014).
- 1066 2. Downing, J.R. *et al.* The Pediatric Cancer Genome Project. *Nat Genet* **44**, 619-22 (2012).
- 1067 3. Grobner, S.N. *et al.* The landscape of genomic alterations across childhood cancers. *Nature* **555**,  
1068 321-327 (2018).
- 1069 4. Carr-Wilkinson, J. *et al.* High Frequency of p53/MDM2/p14ARF Pathway Abnormalities in  
1070 Relapsed Neuroblastoma. *Clin Cancer Res* **16**, 1108-18 (2010).
- 1071 5. Bown, N. *et al.* Gain of chromosome arm 17q and adverse outcome in patients with  
1072 neuroblastoma. *N Engl J Med* **340**, 1954-61 (1999).
- 1073 6. Caren, H. *et al.* High-risk neuroblastoma tumors with 11q-deletion display a poor prognostic,  
1074 chromosome instability phenotype with later onset. *Proc Natl Acad Sci U S A* **107**, 4323-8 (2010).
- 1075 7. Saito-Ohara, F. *et al.* PPM1D is a potential target for 17q gain in neuroblastoma. *Cancer Res* **63**,  
1076 1876-83 (2003).
- 1077 8. Fiscella, M. *et al.* Wip1, a novel human protein phosphatase that is induced in response to  
1078 ionizing radiation in a p53-dependent manner. *Proc Natl Acad Sci U S A* **94**, 6048-53 (1997).
- 1079 9. Fujimoto, H. *et al.* Regulation of the antioncogenic Chk2 kinase by the oncogenic Wip1  
1080 phosphatase. *Cell Death Differ* **13**, 1170-80 (2006).
- 1081 10. Lu, X., Nannenga, B. & Donehower, L.A. PPM1D dephosphorylates Chk1 and p53 and  
1082 abrogates cell cycle checkpoints. *Genes Dev* **19**, 1162-74 (2005).
- 1083 11. Lu, X., Nguyen, T.A. & Donehower, L.A. Reversal of the ATM/ATR-mediated DNA damage  
1084 response by the oncogenic phosphatase PPM1D. *Cell Cycle* **4**, 1060-4 (2005).
- 1085 12. Oliva-Trastoy, M. *et al.* The Wip1 phosphatase (PPM1D) antagonizes activation of the Chk2  
1086 tumour suppressor kinase. *Oncogene* **26**, 1449-58 (2007).
- 1087 13. Shreeram, S. *et al.* Regulation of ATM/p53-dependent suppression of myc-induced lymphomas  
1088 by Wip1 phosphatase. *J Exp Med* **203**, 2793-9 (2006).
- 1089 14. Castellino, R.C. *et al.* Medulloblastomas overexpress the p53-inactivating oncogene  
1090 WIP1/PPM1D. *J Neurooncol* **86**, 245-56 (2008).
- 1091 15. Fuku, T., Semba, S., Yutori, H. & Yokozaki, H. Increased wild-type p53-induced phosphatase 1  
1092 (Wip1 or PPM1D) expression correlated with downregulation of checkpoint kinase 2 in human gastric  
1093 carcinoma. *Pathol Int* **57**, 566-71 (2007).
- 1094 16. Hirasawa, A. *et al.* Association of 17q21-q24 gain in ovarian clear cell adenocarcinomas with  
1095 poor prognosis and identification of PPM1D and APPBP2 as likely amplification targets. *Clin Cancer Res* **9**,  
1096 1995-2004 (2003).
- 1097 17. Lambros, M.B. *et al.* PPM1D gene amplification and overexpression in breast cancer: a qRT-  
1098 PCR and chromogenic in situ hybridization study. *Mod Pathol* **23**, 1334-45 (2010).

- 1099 18. Nikbakht, H. *et al.* Spatial and temporal homogeneity of driver mutations in diffuse intrinsic  
1100 pontine glioma. *Nat Commun* **7**, 11185 (2016).
- 1101 19. Ruark, E. *et al.* Mosaic PPM1D mutations are associated with predisposition to breast and  
1102 ovarian cancer. *Nature* **493**, 406-10 (2013).
- 1103 20. Tan, D.S. *et al.* PPM1D is a potential therapeutic target in ovarian clear cell carcinomas. *Clin*  
1104 *Cancer Res* **15**, 2269-80 (2009).
- 1105 21. Zhang, Y. *et al.* WIP1 regulates the proliferation and invasion of nasopharyngeal carcinoma in  
1106 vitro. *Tumour Biol* **35**, 7651-7 (2014).
- 1107 22. Karlsson, J. *et al.* Four evolutionary trajectories underlie genetic intratumoral variation in  
1108 childhood cancer. *Nat Genet* **50**, 944-950 (2018).
- 1109 23. Krona, C. *et al.* Analysis of neuroblastoma tumour progression; loss of PHOX2B on 4p13 and  
1110 17q gain are early events in neuroblastoma tumourigenesis. *Int J Oncol* **32**, 575-83 (2008).
- 1111 24. Jansen, S. *et al.* De Novo Truncating Mutations in the Last and Penultimate Exons of PPM1D  
1112 Cause an Intellectual Disability Syndrome. *Am J Hum Genet* **100**, 650-658 (2017).
- 1113 25. Lelieveld, S.H. *et al.* Meta-analysis of 2,104 trios provides support for 10 new genes for  
1114 intellectual disability. *Nat Neurosci* **19**, 1194-6 (2016).
- 1115 26. Cohn, S.L. *et al.* The International Neuroblastoma Risk Group (INRG) classification system: an  
1116 INRG Task Force report. *J Clin Oncol* **27**, 289-97 (2009).
- 1117 27. Brodeur, G.M. Neuroblastoma: biological insights into a clinical enigma. *Nat Rev Cancer* **3**,  
1118 203-16 (2003).
- 1119 28. McArdle, L. *et al.* Oligonucleotide microarray analysis of gene expression in neuroblastoma  
1120 displaying loss of chromosome 11q. *Carcinogenesis* **25**, 1599-609 (2004).
- 1121 29. Wilzen, A. *et al.* The Phox2 pathway is differentially expressed in neuroblastoma tumors, but no  
1122 mutations were found in the candidate tumor suppressor gene PHOX2A. *Int J Oncol* **34**, 697-705 (2009).
- 1123 30. Northcott, P.A. *et al.* Medulloblastoma. *Nat Rev Dis Primers* **5**, 11 (2019).
- 1124 31. Buss, M.C. *et al.* The WIP1 oncogene promotes progression and invasion of aggressive  
1125 medulloblastoma variants. *Oncogene* **34**, 1126-40 (2015).
- 1126 32. Kool, M. *et al.* Genome sequencing of SHH medulloblastoma predicts genotype-related  
1127 response to smoothened inhibition. *Cancer Cell* **25**, 393-405 (2014).
- 1128 33. Zhang, X. *et al.* Oncogenic Wip1 phosphatase is inhibited by miR-16 in the DNA damage  
1129 signaling pathway. *Cancer Res* **70**, 7176-86 (2010).
- 1130 34. Kryh, H. *et al.* Comprehensive SNP array study of frequently used neuroblastoma cell lines;  
1131 copy neutral loss of heterozygosity is common in the cell lines but uncommon in primary tumors. *BMC*  
1132 *Genomics* **12**, 443 (2011).
- 1133 35. Schleiermacher, G. *et al.* Variety and complexity of chromosome 17 translocations in  
1134 neuroblastoma. *Genes Chromosomes Cancer* **39**, 143-50 (2004).

- 1135 36. Aguirre, A.J. *et al.* Genomic Copy Number Dictates a Gene-Independent Cell Response to  
1136 CRISPR/Cas9 Targeting. *Cancer Discov* **6**, 914-29 (2016).
- 1137 37. Armstrong, J.F., Kaufman, M.H., Harrison, D.J. & Clarke, A.R. High-frequency developmental  
1138 abnormalities in p53-deficient mice. *Curr Biol* **5**, 931-6 (1995).
- 1139 38. Donehower, L.A. *et al.* Mice deficient for p53 are developmentally normal but susceptible to  
1140 spontaneous tumours. *Nature* **356**, 215-21 (1992).
- 1141 39. Jacks, T. *et al.* Tumor spectrum analysis in p53-mutant mice. *Curr Biol* **4**, 1-7 (1994).
- 1142 40. Mao, J.H. *et al.* Genomic instability in radiation-induced mouse lymphoma from p53  
1143 heterozygous mice. *Oncogene* **24**, 7924-34 (2005).
- 1144 41. Kozakai, Y. *et al.* Inhibition of C-terminal truncated PPM1D enhances the effect of doxorubicin  
1145 on cell viability in human colorectal carcinoma cell line. *Bioorg Med Chem Lett* **24**, 5593-5596 (2014).
- 1146 42. Ogasawara, S. *et al.* Novel inhibitors targeting PPM1D phosphatase potently suppress cancer  
1147 cell proliferation. *Bioorg Med Chem* **23**, 6246-9 (2015).
- 1148 43. Rayter, S. *et al.* A chemical inhibitor of PPM1D that selectively kills cells overexpressing  
1149 PPM1D. *Oncogene* **27**, 1036-44 (2008).
- 1150 44. Yagi, H. *et al.* A small molecule inhibitor of p53-inducible protein phosphatase PPM1D. *Bioorg*  
1151 *Med Chem Lett* **22**, 729-32 (2012).
- 1152 45. Northcott, P.A. *et al.* Enhancer hijacking activates GFI1 family oncogenes in medulloblastoma.  
1153 *Nature* **511**, 428-34 (2014).
- 1154 46. Bouska, A. *et al.* Genome-wide copy-number analyses reveal genomic abnormalities involved in  
1155 transformation of follicular lymphoma. *Blood* **123**, 1681-90 (2014).
- 1156 47. Carless, M.A. & Griffiths, L.R. Cytogenetics of melanoma and nonmelanoma skin cancer. *Adv*  
1157 *Exp Med Biol* **810**, 160-81 (2014).
- 1158 48. Herou, E., Biloglav, A., Johansson, B. & Paulsson, K. Partial 17q gain resulting from  
1159 isochromosomes, unbalanced translocations and complex rearrangements is associated with gene  
1160 overexpression, older age and shorter overall survival in high hyperdiploid childhood acute lymphoblastic  
1161 leukemia. *Leukemia* **27**, 493-6 (2013).
- 1162 49. Malouf, G.G. *et al.* Genomic heterogeneity of translocation renal cell carcinoma. *Clin Cancer*  
1163 *Res* **19**, 4673-84 (2013).
- 1164 50. Sunpaweravong, P., Thu, K.L., Lam, W.L. & Mai, S. Assessment of the clinical relevance of  
1165 17q25.3 copy number and three-dimensional telomere organization in non-small lung cancer patients. *J Cancer*  
1166 *Res Clin Oncol* **142**, 749-56 (2016).
- 1167 51. Xiang, D.B. *et al.* Molecular cytogenetic characterization of mammary neuroendocrine  
1168 carcinoma. *Hum Pathol* **45**, 1951-6 (2014).
- 1169 52. Kleiblova, P. *et al.* Gain-of-function mutations of PPM1D/Wip1 impair the p53-dependent G1  
1170 checkpoint. *J Cell Biol* **201**, 511-21 (2013).
- 1171 53. Tedaldi, G. *et al.* Multiple-gene panel analysis in a case series of 255 women with hereditary  
1172 breast and ovarian cancer. *Oncotarget* **8**, 47064-47075 (2017).

- 1173 54. Abdel-Aziz, A., Mohamed, M.A., Akl, F.M. & Taha, A.N. Survivin expression in  
1174 medulloblastoma: a possible marker for survival. *Pathol Oncol Res* **19**, 413-9 (2013).
- 1175 55. Adida, C., Berrebi, D., Peuchmaur, M., Reyes-Mugica, M. & Altieri, D.C. Anti-apoptosis gene,  
1176 survivin, and prognosis of neuroblastoma. *Lancet* **351**, 882-3 (1998).
- 1177 56. Faccion, R.S. *et al.* Lack of prognostic significance of survivin in pediatric medulloblastoma.  
1178 *Pathol Oncol Res* **17**, 899-908 (2011).
- 1179 57. Islam, A. *et al.* High expression of Survivin, mapped to 17q25, is significantly associated with  
1180 poor prognostic factors and promotes cell survival in human neuroblastoma. *Oncogene* **19**, 617-23 (2000).
- 1181 58. Artomov, M., Rivas, M.A., Genovese, G. & Daly, M.J. Mosaic mutations in blood DNA  
1182 sequence are associated with solid tumor cancers. *NPJ Genom Med* **2**, 22 (2017).
- 1183 59. Krauthammer, M. *et al.* Exome sequencing identifies recurrent somatic RAC1 mutations in  
1184 melanoma. *Nat Genet* **44**, 1006-14 (2012).
- 1185 60. Chuman, Y. *et al.* PPM1D430, a novel alternative splicing variant of the human PPM1D, can  
1186 dephosphorylate p53 and exhibits specific tissue expression. *J Biochem* **145**, 1-12 (2009).
- 1187 61. Richter, M. *et al.* WIP1 phosphatase as a potential therapeutic target in neuroblastoma. *PLoS*  
1188 *One* **10**, e0115635 (2015).
- 1189 62. Wen, J. *et al.* WIP1 modulates responsiveness to Sonic Hedgehog signaling in neuronal  
1190 precursor cells and medulloblastoma. *Oncogene* **35**, 5552-5564 (2016).
- 1191 63. Shiloh, Y. ATM and related protein kinases: safeguarding genome integrity. *Nat Rev Cancer* **3**,  
1192 155-68 (2003).
- 1193 64. Uyanik, B., Grigorash, B.B., Goloudina, A.R. & Demidov, O.N. DNA damage-induced  
1194 phosphatase Wip1 in regulation of hematopoiesis, immune system and inflammation. *Cell Death Discov* **3**,  
1195 17018 (2017).
- 1196 65. Matthay, K.K. *et al.* Neuroblastoma. *Nat Rev Dis Primers* **2**, 16078 (2016).
- 1197 66. Chesler, L. *et al.* Chemotherapy-induced apoptosis in a transgenic model of neuroblastoma  
1198 proceeds through p53 induction. *Neoplasia* **10**, 1268-74 (2008).
- 1199 67. Weiss, W.A., Aldape, K., Mohapatra, G., Feuerstein, B.G. & Bishop, J.M. Targeted expression  
1200 of MYCN causes neuroblastoma in transgenic mice. *EMBO J* **16**, 2985-95 (1997).
- 1201 68. Kratz, C.P. *et al.* Cancer Screening Recommendations for Individuals with Li-Fraumeni  
1202 Syndrome. *Clin Cancer Res* **23**, e38-e45 (2017).
- 1203 69. Frank, A.J. *et al.* The TP53-ARF tumor suppressor pathway is frequently disrupted in large/cell  
1204 anaplastic medulloblastoma. *Brain Res Mol Brain Res* **121**, 137-40 (2004).
- 1205 70. Zhukova, N. *et al.* Subgroup-specific prognostic implications of TP53 mutation in  
1206 medulloblastoma. *J Clin Oncol* **31**, 2927-35 (2013).
- 1207 71. Tong, C.Y. *et al.* Detection of oncogene amplifications in medulloblastomas by comparative  
1208 genomic hybridization and array-based comparative genomic hybridization. *J Neurosurg* **100**, 187-93 (2004).

- 1209 72. Kamihara, J. *et al.* Retinoblastoma and Neuroblastoma Predisposition and Surveillance. *Clin*  
1210 *Cancer Res* **23**, e98-e106 (2017).
- 1211 73. Seidinger, A.L. *et al.* Occurrence of Neuroblastoma among TP53 p.R337H Carriers. *PLoS One*  
1212 **10**, e0140356 (2015).
- 1213 74. Ackermann, S. *et al.* A mechanistic classification of clinical phenotypes in neuroblastoma.  
1214 *Science* **362**, 1165-1170 (2018).
- 1215 75. Keshelava, N. *et al.* Loss of p53 function confers high-level multidrug resistance in  
1216 neuroblastoma cell lines. *Cancer Res* **61**, 6185-93 (2001).
- 1217 76. Tweddle, D.A., Malcolm, A.J., Bown, N., Pearson, A.D. & Lunec, J. Evidence for the  
1218 development of p53 mutations after cytotoxic therapy in a neuroblastoma cell line. *Cancer Res* **61**, 8-13 (2001).
- 1219 77. Carr, J. *et al.* Increased frequency of aberrations in the p53/MDM2/p14(ARF) pathway in  
1220 neuroblastoma cell lines established at relapse. *Cancer Res* **66**, 2138-45 (2006).
- 1221 78. Chen, Z. *et al.* Mdm2 deficiency suppresses MYCN-Driven neuroblastoma tumorigenesis in  
1222 vivo. *Neoplasia* **11**, 753-62 (2009).
- 1223 79. Swarbrick, A. *et al.* miR-380-5p represses p53 to control cellular survival and is associated with  
1224 poor outcome in MYCN-amplified neuroblastoma. *Nat Med* **16**, 1134-40 (2010).
- 1225 80. Veschi, V. & Thiele, C.J. High-SETD8 inactivates p53 in neuroblastoma. *Oncoscience* **4**, 21-22  
1226 (2017).
- 1227 81. Bulavin, D.V. *et al.* Inactivation of the Wip1 phosphatase inhibits mammary tumorigenesis  
1228 through p38 MAPK-mediated activation of the p16(Ink4a)-p19(Arf) pathway. *Nat Genet* **36**, 343-50 (2004).
- 1229 82. Liao, M.J. *et al.* No requirement for V(D)J recombination in p53-deficient thymic lymphoma.  
1230 *Mol Cell Biol* **18**, 3495-501 (1998).
- 1231 83. Okazaki, R. & Ootsuyama, A. p53-dependent delayed effects of radiation vary according to time  
1232 of irradiation of p53 + / - mice. *J Radiat Res* **55**, 25-31 (2014).
- 1233 84. Soussi, T. & Lozano, G. p53 mutation heterogeneity in cancer. *Biochem Biophys Res Commun*  
1234 **331**, 834-42 (2005).
- 1235 85. Goh, A.M., Coffill, C.R. & Lane, D.P. The role of mutant p53 in human cancer. *J Pathol* **223**,  
1236 116-26 (2011).
- 1237 86. Caren, H. *et al.* High-resolution array copy number analyses for detection of deletion, gain,  
1238 amplification and copy-neutral LOH in primary neuroblastoma tumors: four cases of homozygous deletions of  
1239 the CDKN2A gene. *BMC Genomics* **9**, 353 (2008).
- 1240 87. Robinson, J.T. *et al.* Integrative genomics viewer. *Nat Biotechnol* **29**, 24-6 (2011).
- 1241 88. Pharoah, P.D.P. *et al.* PPM1D Mosaic Truncating Variants in Ovarian Cancer Cases May Be  
1242 Treatment-Related Somatic Mutations. *J Natl Cancer Inst* **108**(2016).
- 1243 89. Zhang, W. *et al.* Comparison of RNA-seq and microarray-based models for clinical endpoint  
1244 prediction. *Genome Biol* **16**, 133 (2015).

- 1245 90. Brodeur, G.M. *et al.* Revisions of the international criteria for neuroblastoma diagnosis, staging,  
1246 and response to treatment. *J Clin Oncol* **11**, 1466-77 (1993).
- 1247 91. Theissen, J. *et al.* Chromosome 17/17q gain and unaltered profiles in high resolution array-CGH  
1248 are prognostically informative in neuroblastoma. *Genes Chromosomes Cancer* **53**, 639-49 (2014).
- 1249 92. Hothorn, T.L., B. On the exact distribution of maximally selected rank statistics. *Computational*  
1250 *Statistics & Data Analysis* **43**, 121-137 (2003).
- 1251 93. R-Core-Team. R: A language and environment for statistical computing. *Vienna, Austria: R*  
1252 *Foundation for Statistical Computing* (2013).
- 1253 94. Abel, F. *et al.* A 6-gene signature identifies four molecular subgroups of neuroblastoma. *Cancer*  
1254 *Cell Int* **11**, 9 (2011).
- 1255 95. Birks, D.K. *et al.* High expression of BMP pathway genes distinguishes a subset of atypical  
1256 teratoid/rhabdoid tumors associated with shorter survival. *Neuro Oncol* **13**, 1296-307 (2011).
- 1257 96. Fattet, S. *et al.* Beta-catenin status in paediatric medulloblastomas: correlation of  
1258 immunohistochemical expression with mutational status, genetic profiles, and clinical characteristics. *J Pathol*  
1259 **218**, 86-94 (2009).
- 1260 97. Kool, M. *et al.* Integrated genomics identifies five medulloblastoma subtypes with distinct  
1261 genetic profiles, pathway signatures and clinicopathological features. *PLoS One* **3**, e3088 (2008).
- 1262 98. Robinson, G. *et al.* Novel mutations target distinct subgroups of medulloblastoma. *Nature* **488**,  
1263 43-8 (2012).
- 1264 99. Roth, R.B. *et al.* Gene expression analyses reveal molecular relationships among 20 regions of  
1265 the human CNS. *Neurogenetics* **7**, 67-80 (2006).
- 1266 100. Lindhagen, E., Nygren, P. & Larsson, R. The fluorometric microculture cytotoxicity assay. *Nat*  
1267 *Protoc* **3**, 1364-9 (2008).
- 1268 101. Gallo-Oller, G. *et al.* P144, a Transforming Growth Factor beta inhibitor peptide, generates  
1269 antitumoral effects and modifies SMAD7 and SKI levels in human glioblastoma cell lines. *Cancer Lett* **381**, 67-  
1270 75 (2016).
- 1271 102. Meyers, R.M. *et al.* Computational correction of copy number effect improves specificity of  
1272 CRISPR-Cas9 essentiality screens in cancer cells. *Nat Genet* **49**, 1779-1784 (2017).
- 1273 103. Szklarczyk, D. *et al.* The STRING database in 2017: quality-controlled protein-protein  
1274 association networks, made broadly accessible. *Nucleic Acids Res* **45**, D362-D368 (2017).
- 1275 104. Sveinbjornsson, B. *et al.* Expression of enzymes and receptors of the leukotriene pathway in  
1276 human neuroblastoma promotes tumor survival and provides a target for therapy. *FASEB J* **22**, 3525-36 (2008).
- 1277 105. Fransson, S. *et al.* Estimation of copy number aberrations: Comparison of exome sequencing  
1278 data with SNP microarrays identifies homozygous deletions of 19q13.2 and CIC in neuroblastoma. *Int J Oncol*  
1279 **48**, 1103-16 (2016).
- 1280 106. Dobin, A. *et al.* STAR: ultrafast universal RNA-seq aligner. *Bioinformatics* **29**, 15-21 (2013).
- 1281 107. Anders, S., Pyl, P.T. & Huber, W. HTSeq--a Python framework to work with high-throughput  
1282 sequencing data. *Bioinformatics* **31**, 166-9 (2015).

- 1283 108. Love, M.I., Huber, W. & Anders, S. Moderated estimation of fold change and dispersion for  
1284 RNA-seq data with DESeq2. *Genome Biol* **15**, 550 (2014).
- 1285 109. Mootha, V.K. *et al.* PGC-1alpha-responsive genes involved in oxidative phosphorylation are  
1286 coordinately downregulated in human diabetes. *Nat Genet* **34**, 267-73 (2003).
- 1287 110. Subramanian, A. *et al.* Gene set enrichment analysis: a knowledge-based approach for  
1288 interpreting genome-wide expression profiles. *Proc Natl Acad Sci U S A* **102**, 15545-50 (2005).
- 1289 111. Liberzon, A. *et al.* The Molecular Signatures Database (MSigDB) hallmark gene set collection.  
1290 *Cell Syst* **1**, 417-425 (2015).
- 1291

## Figures outline

1. Fig 1A-F
2. Fig 2A-C
3. Fig 3A-K
4. Fig 4A-D
5. Fig 5A-F
6. Fig 6A-E



# Figure 1

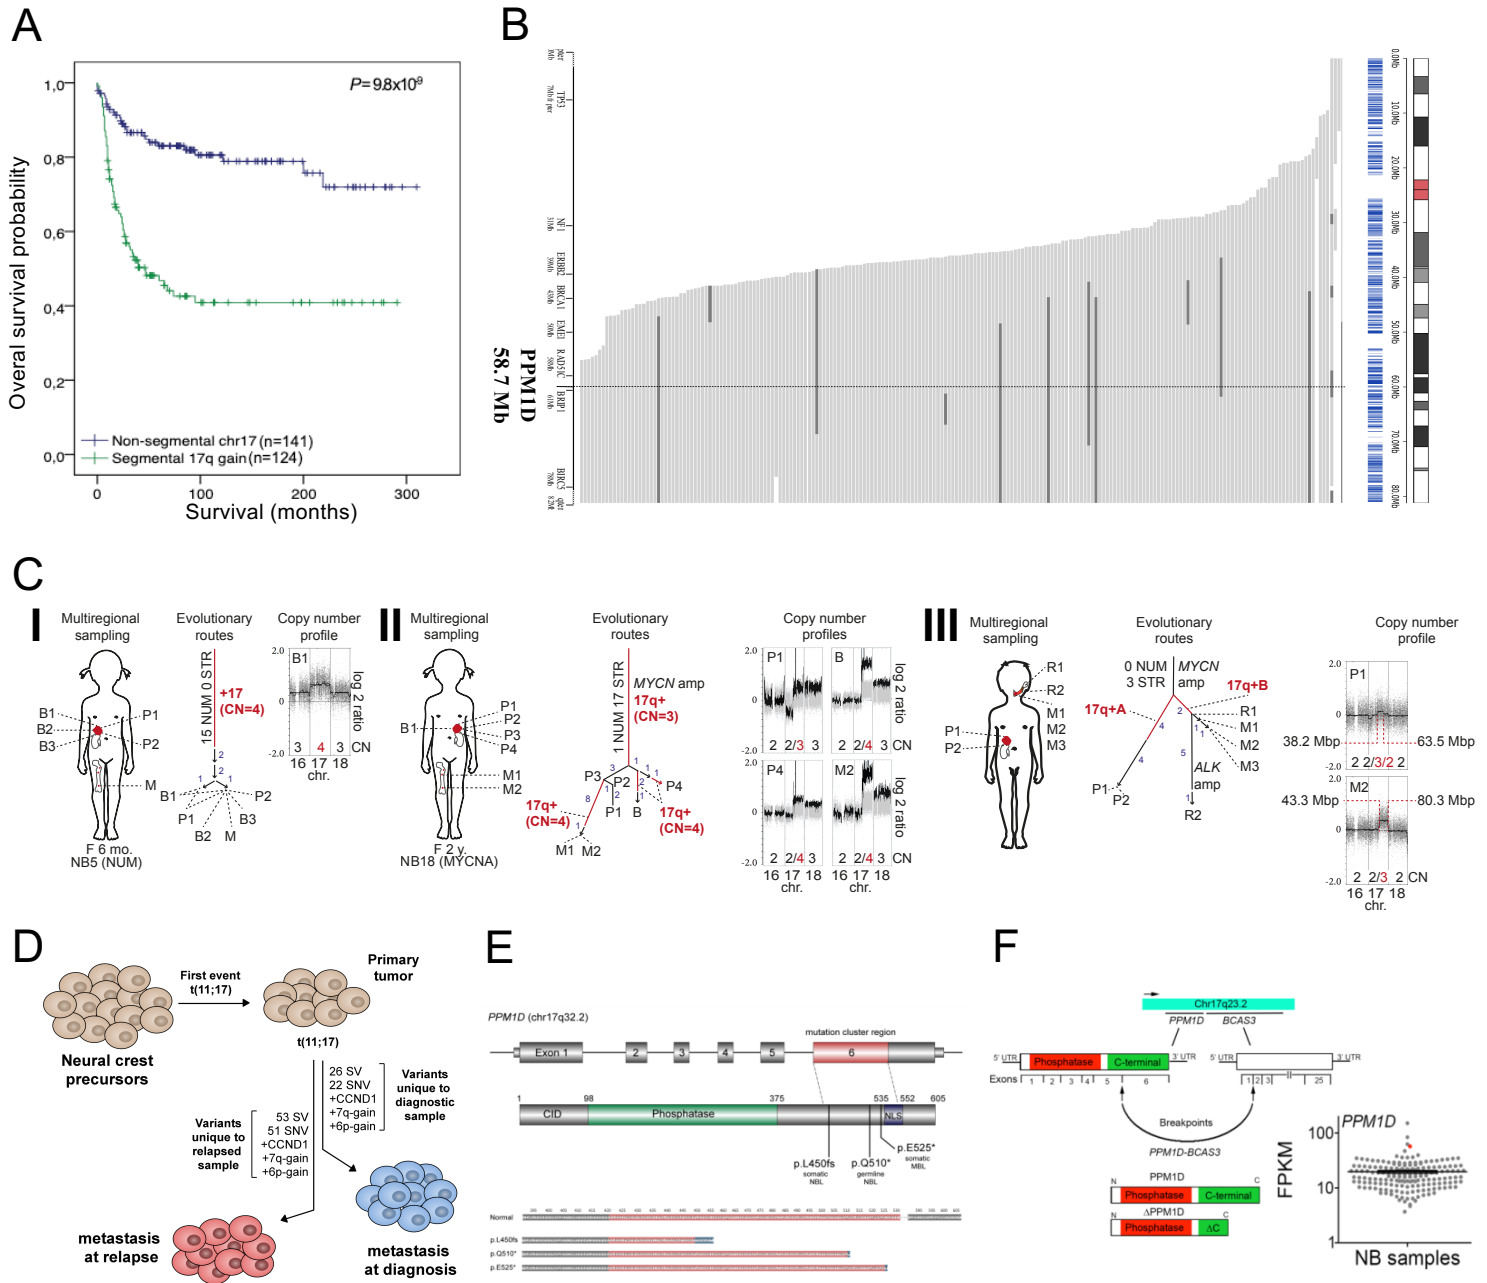

**Figure 1. The *PPM1D* gene located on chromosome 17q is frequently altered in neuroblastoma.** **A.** Gain of 17q correlates with poor survival in neuroblastoma. Neuroblastoma survival probability according to Kaplan-Meier analysis in a Swedish population-based patient material in relation to chromosome 17 status in the tumor tissue shows worse overall survival (OS) for children with 17q segmental gain (n=124; green line, 48.0% 5 year OS) vs children with no segmental 17q gain (n=141; blue line, 82.8% 5 year OS). For definition of the genomic profile groups (*Carén et al. 2010*). **B.** *PPM1D* is included in all cases of 17q gain. Summary of segmental gains of chromosome 17 in the extended Swedish neuroblastoma cohort (n=435). 208 samples displayed segmental gain of chromosome 17 as indicated by gray horizontal bars with regions displaying additional level of gain (more copies) indicated by black color. The dotted vertical line indicates location of the *PPM1D* locus in relation to the segmental 17q gains in the cohort. An additional 149 cases showed whole chromosome gain of chromosome 17 (not shown in the figure). **C.** Evolutionary trajectories of *PPM1D* gain. Multiregional tumor sampling reveals *PPM1D* copy number accumulation in high risk neuroblastoma. **(I)** Genome array analysis of pre-treatment biopsies (B1-B3), post-chemotherapy resection specimens (P1-P2) and concurrent bone marrow metastasis (M) from a female (F) 6-month-old (mo.) patient with a low risk neuroblastoma (NB), having a whole genome profile with only numerical (NUM) changes (I, left). Evolutionary reconstruction (I, center) shows 15 aberrations in the phylogenetic stem, i.e. present in >90% of tumor cells in all samples, followed by several additional whole chromosome changes at subclonal levels (arrows with numbers in blue type), distributed over a subset of samples. The stem aberrations include four copies (CN=4) of chromosome 17, as shown by a higher log<sub>2</sub> ratio (I, right) than for the trisomic chromosomes (chr. 16 and 18).

## Figure 1

No further chromosome 17 aberrations were detected. **(II)** Multiregional array analysis of a *MYCN* amplified (*MYCNA*) high-risk NB in a 2-year-old (y.) with a metastatic relapse in the bone marrow indicates a stem dominated by structural (STR) rearrangements including segmental gain (CN=3) of the *PPM1D* region in 17q. Additional *PPM1D*/17q copies (CN=4) are gained in samples B, M1, M2 and P4 either clonally (>90% of tumor cells, red line) or subclonally (red arrow). **(III)** Another high-risk *MYCN* amplified NB demonstrates parallel evolution of *PPM1D*/17q gain in different tumor regions, as evidenced by different genomic breakpoints (III, right) in different sample sets, including two temporally distinct relapses (R1 and R2). **D.** Gain of 17q including *PPM1D* is the first and only common aberration in a high-risk metastatic neuroblastoma. Whole genome sequencing of different metastatic sites at diagnosis and relapse revealed an unbalanced translocation t(11;17) as the only common aberration whereas multiple unique but different genetic aberrations unique to respective sample were present in the two metastatic clones sequenced. **E.** Schematic representation of coding and protein sequence of *PPM1D*/WIP1 with mutations shown according location in protein and predicted amino acid sequences resulting from the *PPM1D* variants detected in neuroblastoma (NBL) and medulloblastoma (MBL) patients. Amino acids translated from exon 6 depicted in red with mutated amino acids depicted in blue. **F.** *PPM1D* expression levels are high in neuroblastoma tumor (red) bearing transcript of the *PPM1D-BCAS3* fusion, shown by FPKM (Fragments Per Kilobase per Million mapped reads).

## Figure 2

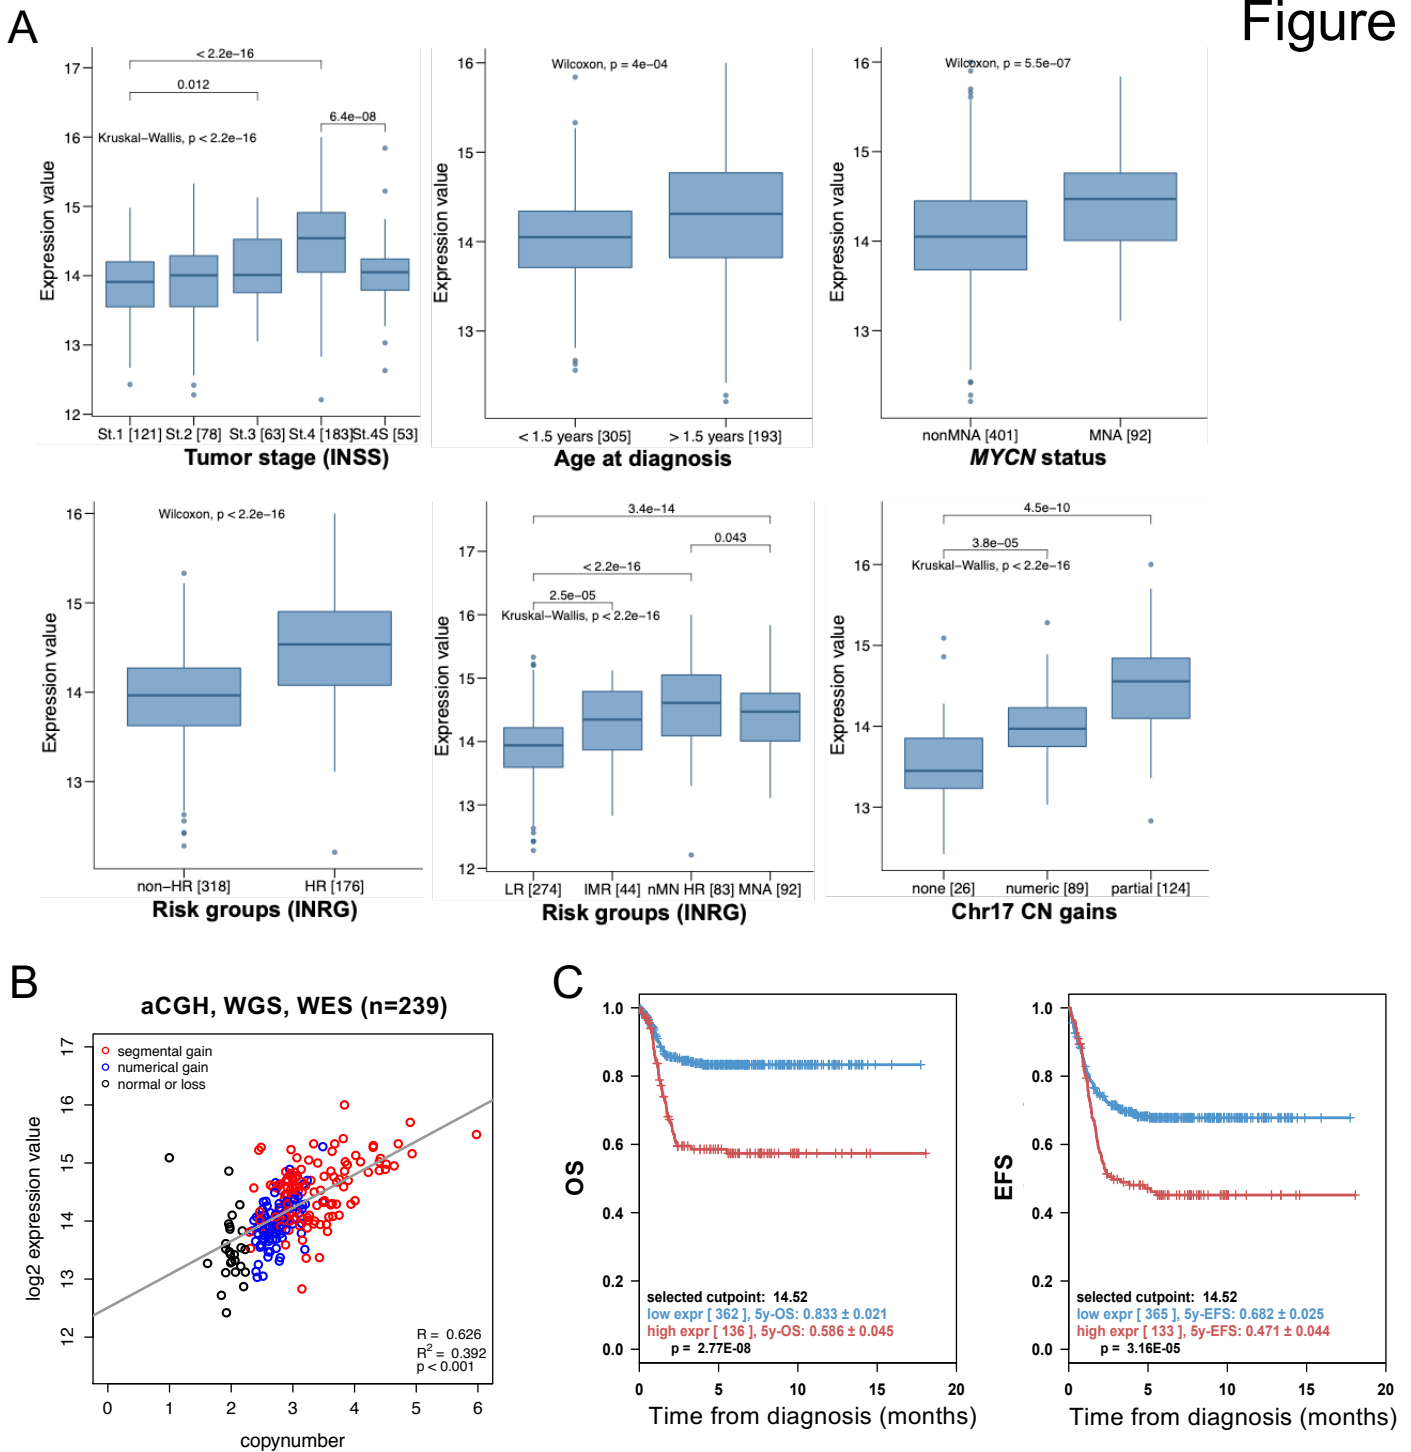

**Figure 2. *PPMID* expression correlates with unfavorable prognosis markers, decreased survival of neuroblastoma patients, and is gene-dosage dependent. A.** Expression of *PPMID* is associated with unfavorable prognostic markers. *PPMID* expression is shown in box-and whisker plots for neuroblastoma tumor stages according to the INSS classification, age at diagnosis, amplification status of *MYCN*, INRG risk group classification (LR=low risk, IMR= intermediate risk, NMN HR= non-*MYCN* amplified high risk, MNA=*MYCN* amplified), and chromosome 17 copy number (CN) gains. **B.** Correlation analysis showing a gene-dosage dependent expression pattern of *PPMID*. Quantitative copy number information for *PPMID* based on CGH, whole exome (WES) and whole genome sequencing (WGS) data (x-axis) is shown against normalized log<sub>2</sub> expression values from paired RNA-Seq data (y-axis). CN gains are highlighted and separated into numerical gains copying the whole chromosome 17 (blue) and segmental gains affecting only a sub-region involving *PPMID* (red, min/max/mean size 2.4/70.8/35.8 Mb). Correlation and P-values were obtained by Pearson's correlation coefficient. **C.** High expression of *PPMID* is associated with adverse patient outcome. Kaplan–Meier survival estimates are shown for overall survival (OS, left) and event-free survival (EFS, right) in the whole cohort (n=498). P values were obtained by log-rank test. The cohort was dichotomized according to the optimal cut-off expression for *PPMID*.

# Figure 3

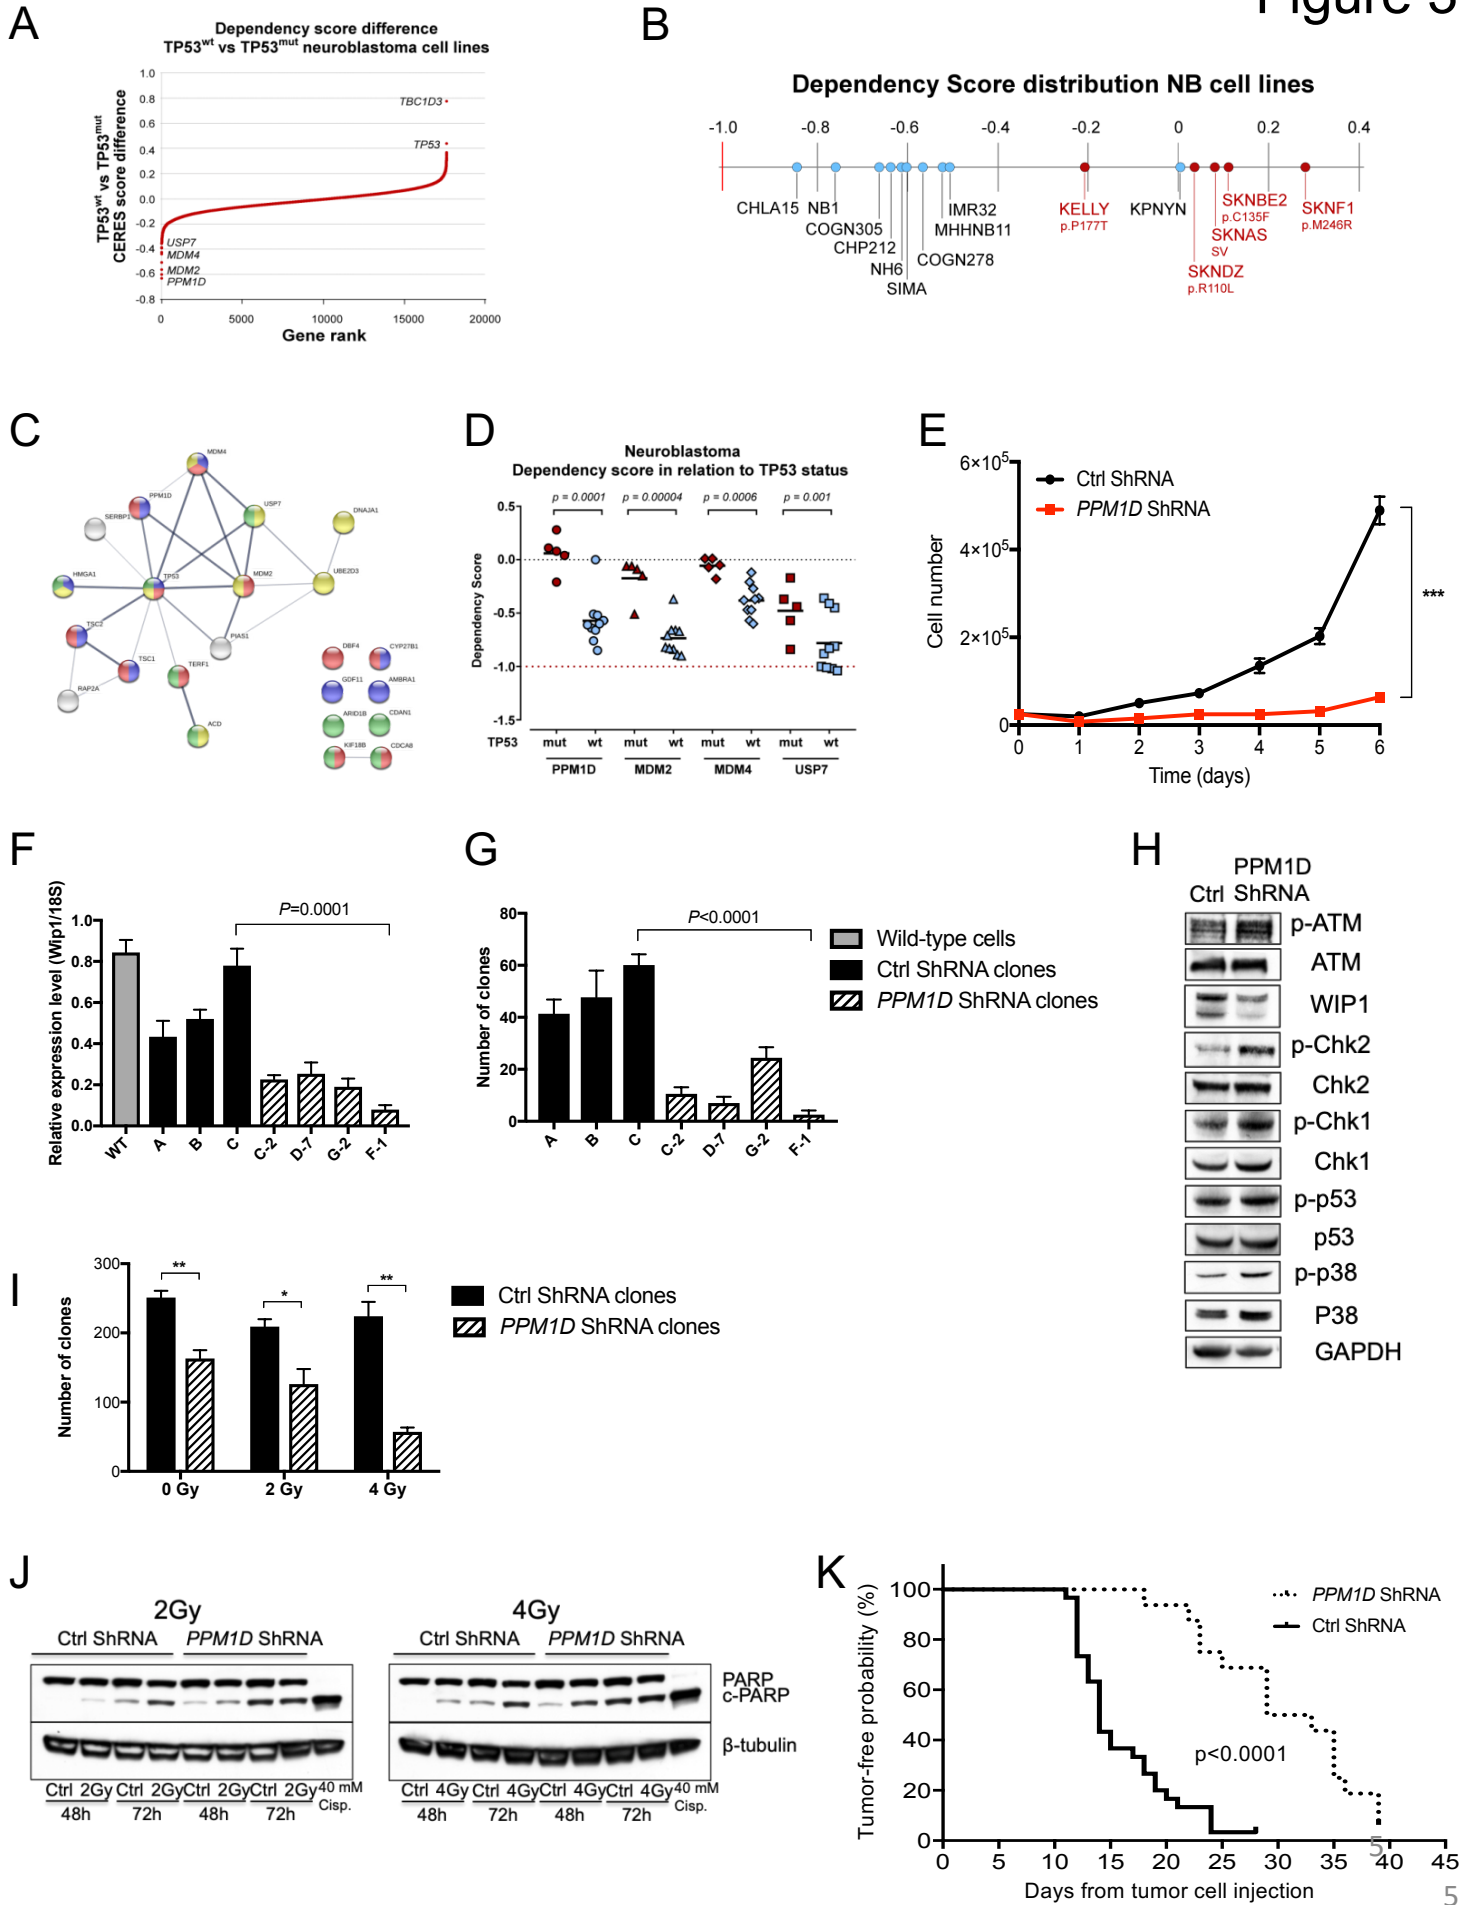

## Figure 3

**Figure 3. *PPM1D* expression is important for neuroblastoma** **A.** Wild type *TP53* neuroblastoma cells are highly dependent on *PPM1D* expression for survival. Genome-scale CRISPR-Cas9 screening showing ranked average difference in genetic dependencies between wild-type *TP53* and mutated *TP53* neuroblastoma cell lines. **B.** Dependency score showing high *PPM1D* dependency in wild-type *TP53* neuroblastoma cells. Wild-type *TP53* neuroblastoma cell lines (blue, high dependency) and *TP53* mutated cell lines (red, low dependency) with *TP53* status. **C.** STRING database analysis showing *PPM1D* dependency in wild-type *TP53* neuroblastoma cells. Among the top 30 genes with largest difference in CERES score there was enrichment of genes involved in negative regulation of cell proliferation (indicated in blue), cell cycle process (red), cellular response to DNA damage (yellow) and chromosome organization (green). The width of the edges corresponds to level of confidence (medium confidence STRING scores of 0.4; high confidence STRING score 0.7; and highest confidence STRING score 0.9). **D.** Neuroblastoma cells with wild-type *TP53* are dependent on *PPM1D* expression for survival. Dependency scores of *PPM1D*, *MDM2*, *MDM4*, and *USP7* in relation to *TP53* mutational status. **E.** Knockdown of *PPM1D* with shRNA impairs growth of neuroblastoma cell line SK-N-BE(2). Mean with S.D. of three independent experiments are shown (t-test day 6, SK-N-BE(2)  $P=0.0002$ ). **F.** ShRNA-mediated knockdown of *PPM1D*. Normalized *PPM1D* mRNA expression in wild-type SK-N-BE(2) cells (grey bar) compared to three clones transfected with a non-silencing control shRNA (black bars, A, B, C) and four different *PPM1D* shRNA knockdown clones (hatched bars, C-2, D-7, G-2 and F-1). The expression of *PPM1D* mRNA was significantly lower in the clones transfected with the different *PPM1D* shRNAs compared to the control transfected clones (one-way ANOVA with Bonferroni correction  $P<0.05$ ). Mean with S.D. of three determinants are shown. **G.** Knockdown of *PPM1D* inhibits colony-forming potential of neuroblastoma cells. Clonogenic assay of SK-N-BE(2) cells showing decreased colony formation in shRNA *PPM1D* knockdown cells (one-way ANOVA with Bonferroni post test  $P<0.0001$ ) with lowest colony forming ability in the F-1 clone (t-test,  $P<0.0001$ ). Mean with S.D. of nine determinants are displayed. **H.** Knockdown of *PPM1D* inhibits dephosphorylation of WIP1 target genes. Phosphorylation levels of WIP1 targets increased after *PPM1D* knockdown (clone F-1) compared to control transfected cells (clone C), as shown by western blotting. **I.** *PPM1D* downregulation sensitizes neuroblastoma cells to irradiation. *PPM1D* knockdown of SK-N-BE(2) cells showed an irradiation dose-dependent decrease in clonogenic forming ability compared to control transfected cells. Mean with S.D. of three experiments are displayed (t-test, 0 Gy  $P=0.00486$ , 2 Gy  $P=0.0277$ , 4 Gy  $P=0.0015$ ). **J.** ShRNA-mediated knockdown of *PPM1D* increases irradiation-induced apoptosis. Protein expression of the pro-apoptotic marker cPARP in *PPM1D* knockdown cells compared to control transfected cells 48 and 72 hours after exposure to irradiation, analyzed by western blot.  $\beta$ -tubulin was used as protein loading control. **K.** Knockdown of *PPM1D* delays neuroblastoma development. Clone F-1 and control clone C were injected in NMRI *nu/nu* mice (shRNA;  $n=8$ , control;  $n=15$ ), 5 million cells sc. bilaterally. Tumor development was significantly delayed (log-rank test  $P<0.0001$ ) showing median tumor development (0.100 mL) to be more than doubled (33 days median, vs. 15 days) after *PPM1D* downregulation (dashed line) compared to animals injected with cells transfected with the non-silencing control shRNA (black line).

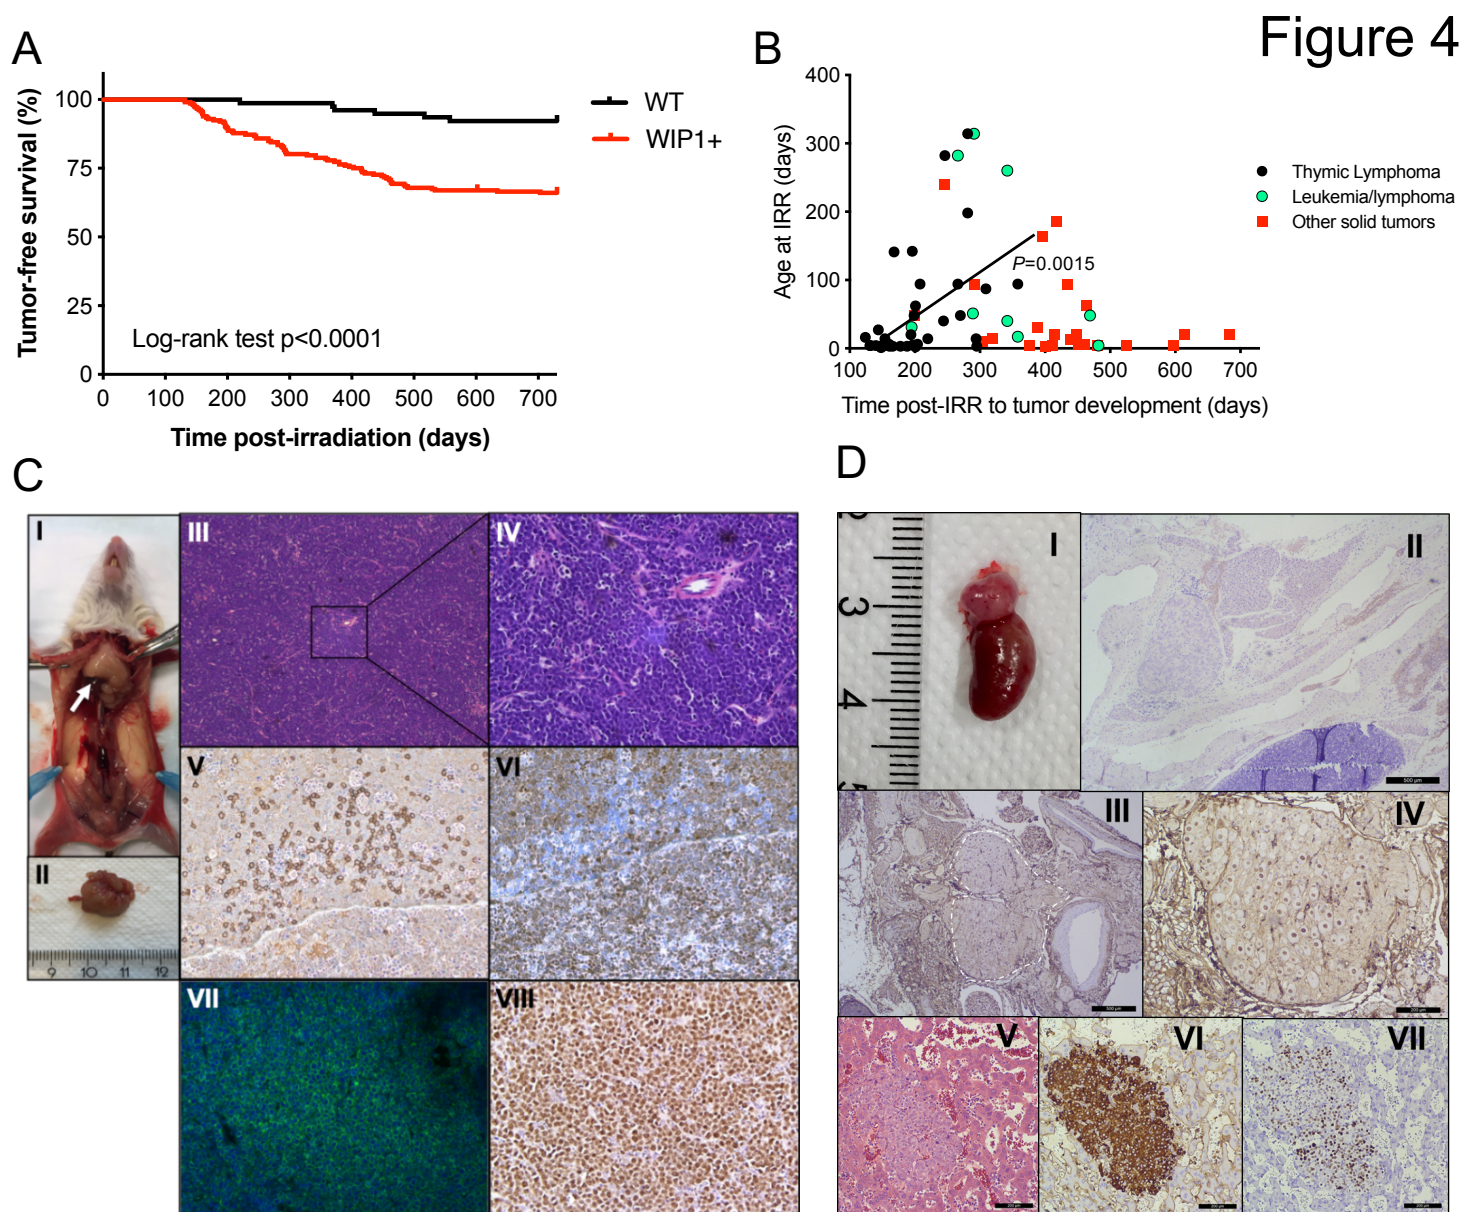

**Figure 4. *PPMID*/WIP1-transgenic mice have increased carcinogenic susceptibility compared to wild-type mice following irradiation.**

**A.** Kaplan-Meier analysis of irradiated *PPMID*/WIP1-transgenic mice with the endpoint defined as detection of tumors. Mice were either homozygous or heterozygous for the human *PPMID* gene. WIP1 positive transgenic mice (n=210) and their wild-type littermates (n=79) with different degrees of 129X1/SvJ-strain background were subjected to one 4.5 Gy sublethal whole-body irradiation dose at different days of age (1-314 days old). Mice that were positive for the human *PPMID* gene developed frequently more tumors compared to wild-type mice (Log rank test,  $P < 0.0001$ ) following irradiation. Among the *PPMID*/WIP1-positive mice 72 mice developed tumors compared with six mice in the wild-type group (Fisher's exact test,  $P < 0.0001$ ). The odds ratio of developing cancer in the *PPMID*/WIP1-positive group compared to the wild-type group was 6.3 (95% confidence interval 2.7-14.2). **B.** Time to tumor development of thymic lymphomas post-irradiation (IRR) correlated positively with age at irradiation (Pearson,  $P = 0.0015$ . Spearman,  $P = 0.001$ ); the majority of lymphomas manifested  $< 300$  days. There was no correlation between age at irradiation and time to tumor development in mice diagnosed with other solid tumors (Pearson  $P = 0.0658$ , Spearman  $P = 0.1589$ ) and mice diagnosed having leukemia/lymphoma (Pearson  $P = 0.3651$ , Spearman  $P = 0.1977$ ). **C.** Thymic lymphomas were the most common disease manifestation in irradiated human *PPMID*/WIP1-positive mice. Representative image of thoracic tumor *in situ* indicated by the arrow (**I**) and after dissection (**II**). Microscopy at 4X (**III**) and 20X (**IV**) magnification after hematoxylin and eosin (H&E) staining showed atypical lymphoblastic cells having intense mitotic activity. **V**) Infiltration of B220-positive cells. **VI-VII**) The majority of cells are positive for the pan-T cell marker CD3. **VIII**) Staining for Ki-67 was highly positive, indicating high proliferative activity. The thoracic organs, mediastinum (heart base and hilum of the lung), thymus tumor, lymph nodes displayed extensive infiltrates of neoplastic and highly malignant lymphoblasts consistent with lymphoblastic lymphoma. **D.** Adrenal neuroblastoma and liver metastasis from a *PPMID*/WIP1 transgenic mouse **I**) Macroscopic view of the adrenal tumor. **II**) Hematoxylin/Eosin staining of the adrenal tumor. **III-IV**) PHOX2B-staining was positive indicating neural crest origin of this neuroblastoma-like tumor. **V-VII**) Liver metastasis with Hematoxylin/Eosin-staining, Synaptophysin-staining and PHOX2B-staining, respectively.

# Figure 5

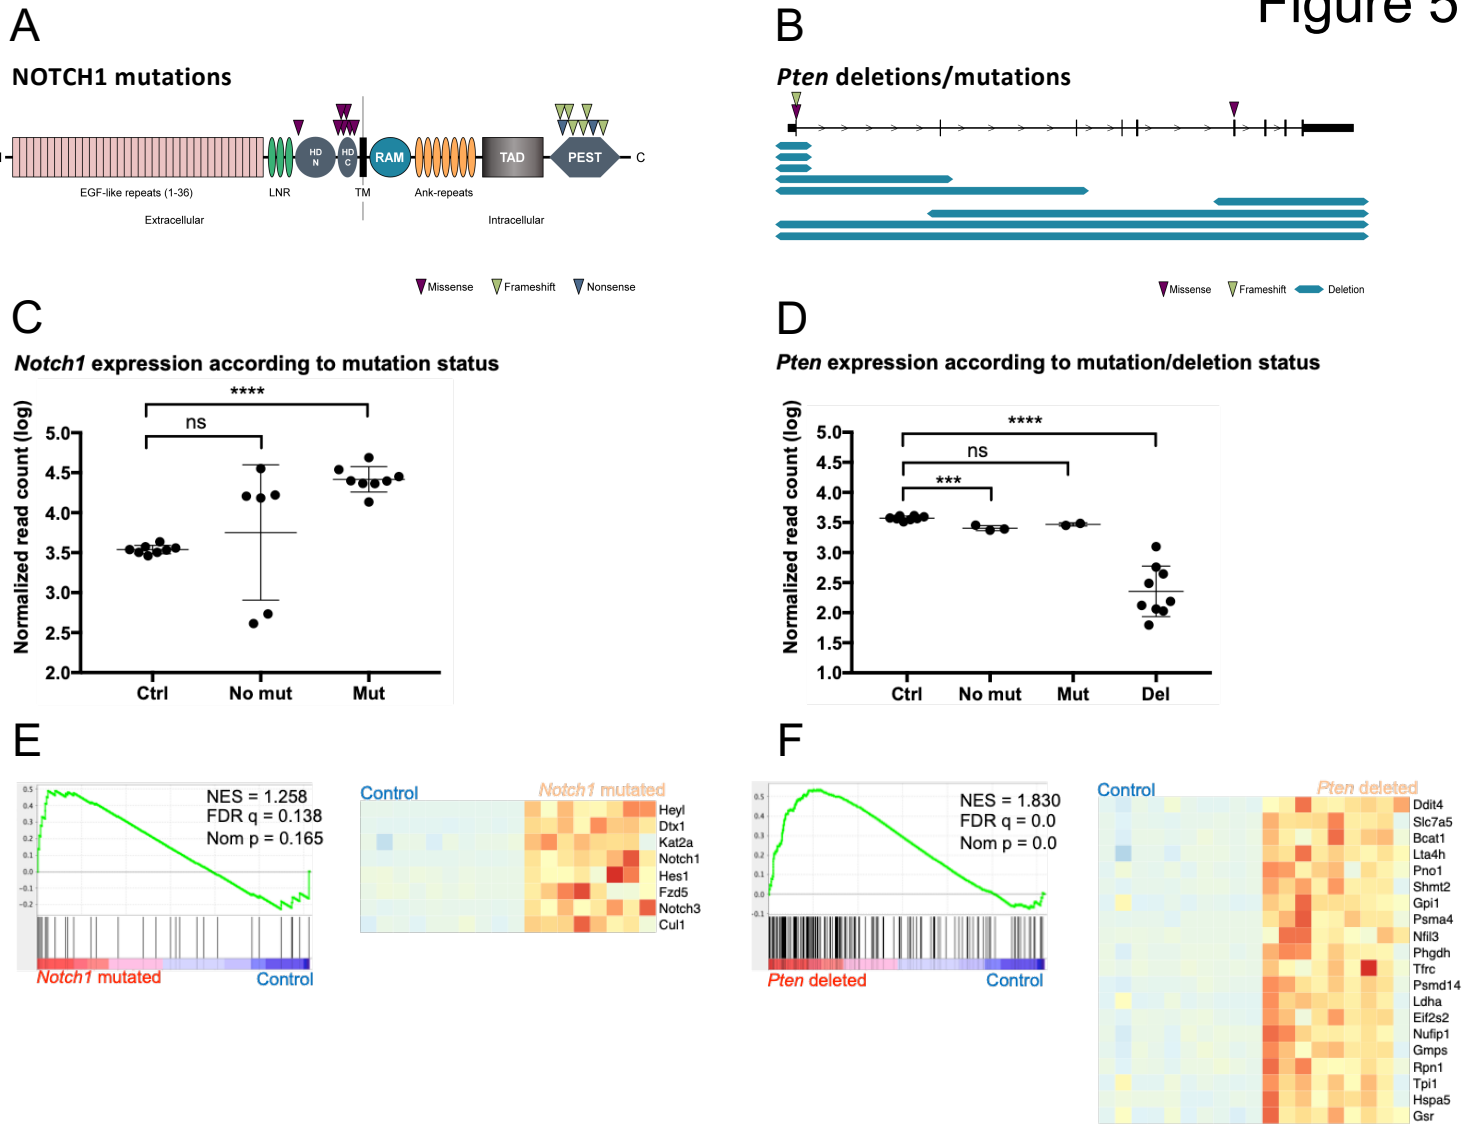

**Figure 5. *PPM1D*-induced thymic lymphomas show typical *Notch1* and *Pten* aberrations.** **A.** Schematic overview of the NOTCH1 protein showing the distribution of mutations in 15 whole-exome sequenced lymphomas. Purple triangles indicate missense mutations in the intracellular heterodimerization (HD) domain, whereas green and blue triangles indicate frameshift or nonsense mutations in the extracellular PEST domain. LNR: Lin/NOTCH repeats; HD: heterodimerization domain; TM: transmembrane domain; RAM: RBP-JK associated molecule region; TAD: transactivation domain; PEST: sequence rich in proline, glutamic acid, serine, and threonine. **B.** Diagram of the *Pten* gene showing the size and distribution of *Pten* deletions/mutations in lymphomas. The location of the point mutations are shown with purple and green triangles above the gene diagram. The blue lines below the gene diagram shows the size of the deletions identified by exome sequencing. **C.** Expression of the *Notch1* transcript in controls and tumors with and without *Notch1* mutation. The y axis shows the log value of the number of RNA-seq reads mapping to the *Notch1* gene. The difference between controls and tumors without *Notch1* mutations is not significant (ns), whereas *Notch1* expression is significantly higher in the mutated tumors (adjusted p value < 0.0001; Bonferroni multiple comparisons test). **D.** Expression of *Pten* in controls and tumors with and without *Pten* mutation/deletion. Expression is significantly lower in tumors harboring deletions than in controls (adjusted p value 0,0001, Bonferroni multiple comparisons test). **E.** Gene set enrichment analysis comparing *Notch1* mutated tumors to controls demonstrated a significant upregulation of genes related to Notch signalling (MSigDB "Hallmarks" gene set). Left panel: Enrichment plot from GSEA. Right panel: Heatmap showing the expression (z scores) of core enriched genes. Red color indicates positive z scores; blue color indicates negative z scores. **F.** Gene set enrichment analysis comparing *Pten* deleted tumors to controls demonstrated upregulation of genes related to the Mtorc1 pathway (MSigDB "Hallmarks" gene set). Left panel: Enrichment plot from GSEA. Right panel: Heatmap showing the expression (z scores) of the top 20 core enriched genes. Red color indicates positive z scores; blue color indicates negative z scores.

# Figure 6

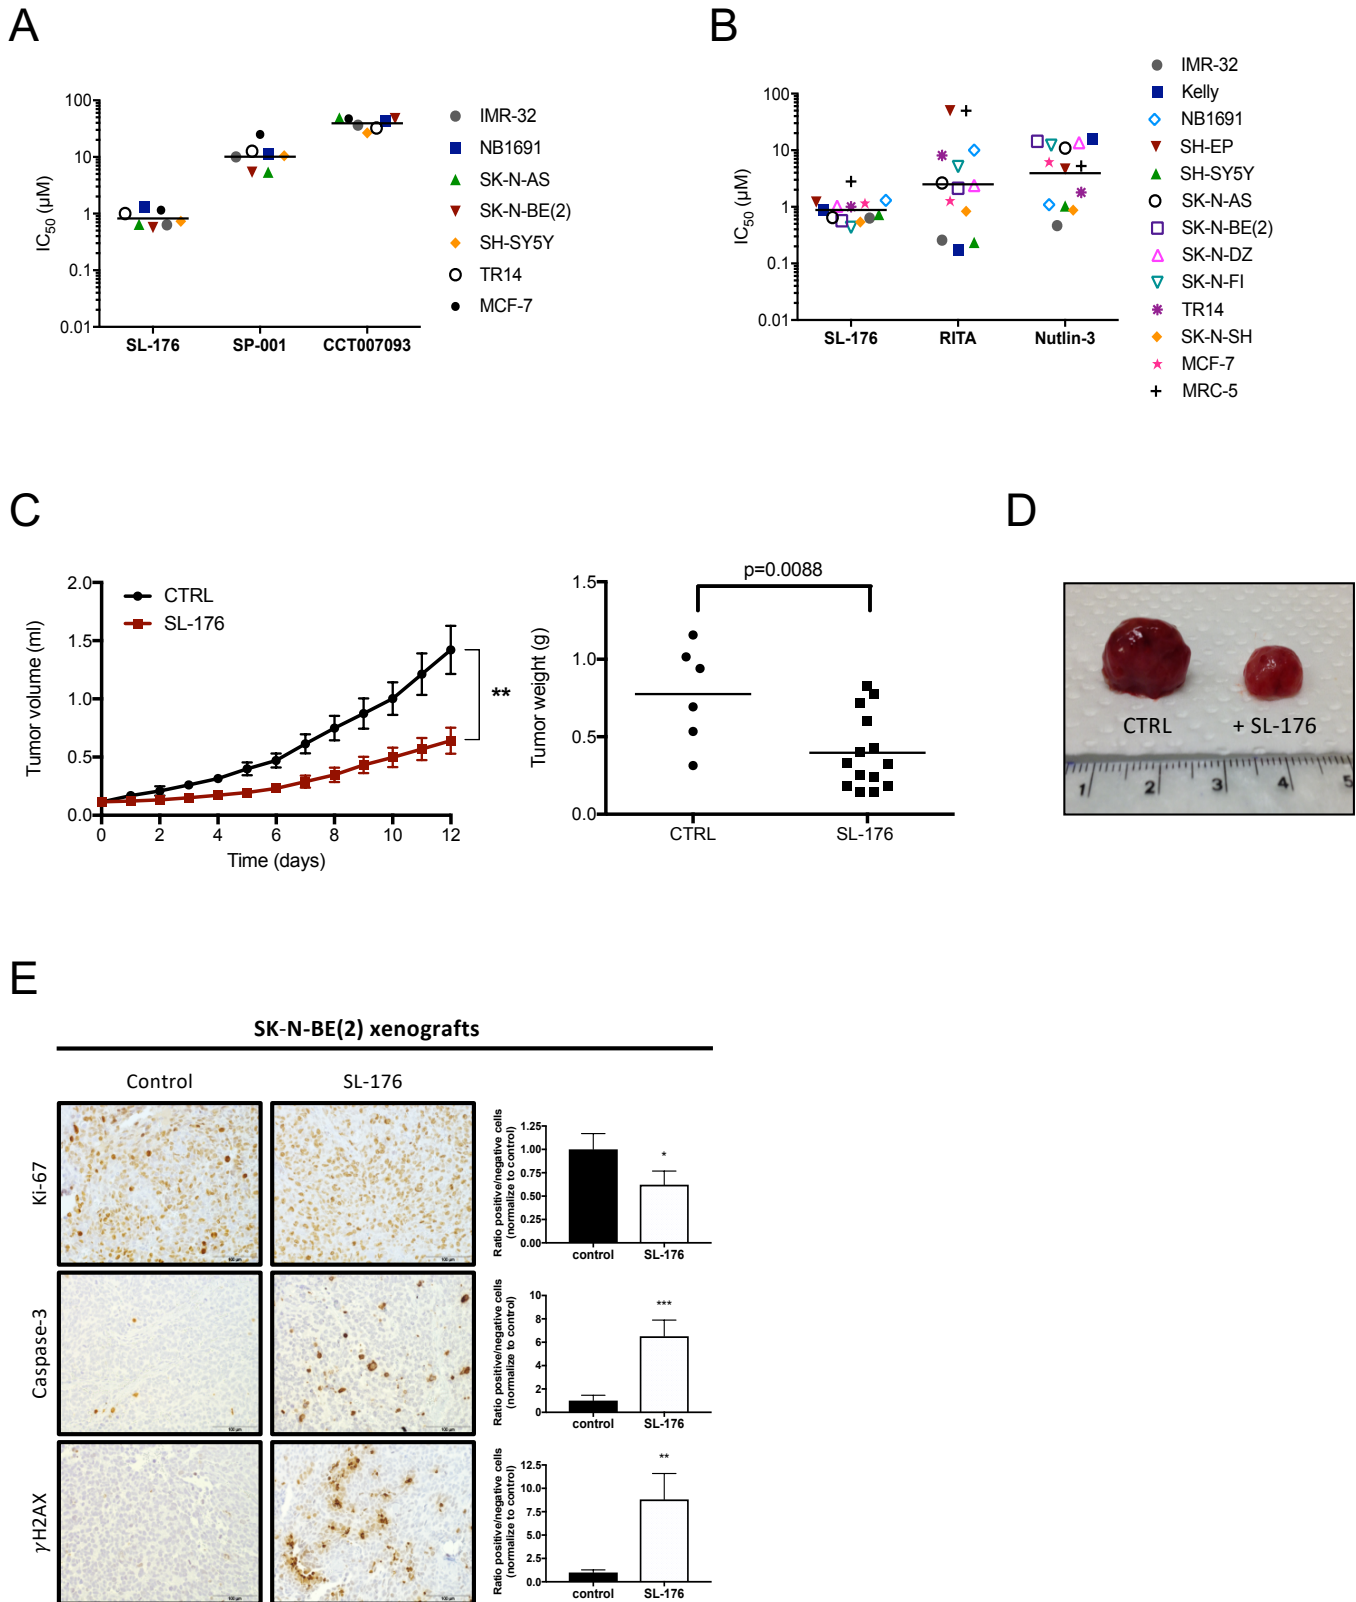



## Figure 6

**Figure 6. The WIP1 phosphatase inhibitor SL-176 suppresses neuroblastoma and medulloblastoma growth *in vitro* and *in vivo*.** **A.** SL-176 is the most efficient inhibitor of tumor cell growth. IC<sub>50</sub> values for six neuroblastoma cell lines and the *PPM1D*-amplified breast cancer cell line MCF-7 exposed to the WIP1 inhibitors SL-176, SP001 or CCT007093. Horizontal lines indicate mean. IC<sub>50</sub> values were calculated from cell viability assays performed at least three times. SL-176 displayed the lowest mean of IC<sub>50</sub> value of the three tested WIP1 inhibitors (one-way ANOVA on log IC<sub>50</sub>  $P < 0.0001$ , Bonferroni post-test: SL-176 vs SP-001  $P < 0.0001$ , SL-176 vs CCT007093  $P < 0.0001$ ). **B.** SL-176 is a potent inhibitor of neuroblastoma cell growth. IC<sub>50</sub> values for eleven neuroblastoma cell lines, the breast cancer cell line MCF-7 and the fibroblast cell line MRC-5 exposed to the specific WIP1 inhibitor SL-176, the p53-MDM2 interaction inhibitor RITA or the MDM2 antagonist Nutlin-3. Horizontal lines indicate mean. SL-176 displayed the lowest mean of IC<sub>50</sub>s in the neuroblastoma cell lines of the three tested compounds (mean IC<sub>50</sub> for SL-176: 0.77  $\mu$ M, RITA: 2.0  $\mu$ M and Nutlin-3: 3.7  $\mu$ M), however a significant difference was only evident between SL-176 and Nutlin-3 (one-way ANOVA  $P = 0.029$ , Bonferroni post-test SL-176 vs. Nutlin-3  $P = 0.026$ ). IC<sub>50</sub> values were calculated from results from cell viability assay WST-1 performed at least three times. **C.** SL-176 inhibit neuroblastoma growth *in vivo*. Nude mice were injected with neuroblastoma SK-N-BE(2) cells to form xenografts on the flank. Daily i. p. injections of SL-176 (n=14) for 12 days, starting at tumor volume 0.1 mL, compared to no treatment (CTRL, n=6) showed that WIP1 inhibition through SL-176 significantly impaired the growth of neuroblastoma xenografts (t-test, day 12  $P = 0.002$ ) (left, horizontal bars, mean weight), and significantly reduced tumor weight after 12 days ( $P = 0.0088$ ) (right). Mean with S.E.M. are displayed. **D.** Representative photograph of dissected neuroblastoma xenograft tumor in comparison. **E.** SL-176 decrease proliferation, induce apoptosis and activate  $\gamma$ H2AX in xenograft tumors. Immunohistochemical analysis of SK-N-BE(2) xenograft tumors. Tumor sections were stained with anti-Ki-67, anti-Caspase 3, and anti  $\gamma$ H2AX antibodies. Representative examples of immunostaining are shown. Images were acquired at 400X magnification. Identification and quantification of positive and negative cells was carry out with ImageJ software.
